# Supplementary material for: Pre-clinical development of AP4B1 gene replacement therapy for hereditary spastic paraplegia type 47
Source: PubMed Central journal article supplement (PMC11554807; doi:10.1038/s44321-024-00148-5), 2024-10-02
Supplement: 44321_2024_148_MOESM1_ESM.pdf [file 44321_2024_148_MOESM1_ESM.pdf]

## **Appendix**

### **Table of contents**

Appendix Figure S1 - page 2

Appendix Figure S2 - page 3

Appendix Figure S3 - page 4

Appendix Figure S4 - page 5

Appendix Table S1- page 6 - 22

Appendix Table S2 - page 23 - 35

Appendix Table S3 - page 36

Appendix Table S4 – page 37

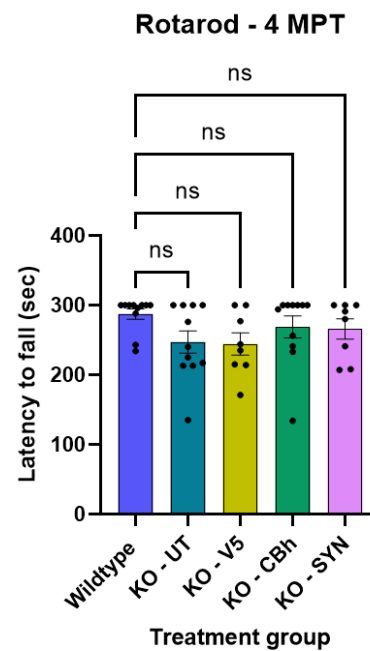

**Appendix Figure S1: Rotarod performance at 4 months of age following injection in neonatal demonstrates no significant phenotypic difference between wild type mice and untreated/control treated *ap4b1* <sup>-/-</sup> mice.** A trend of reduced latency to fall is observed with untreated and control treated mice and a rescue with treatment. All data groups are males,  $n \geq 8$  per group. Data are presented as mean  $\pm$  SEM and are analysed by the Kruskal-Wallis test with Dunn's multiple comparison test.

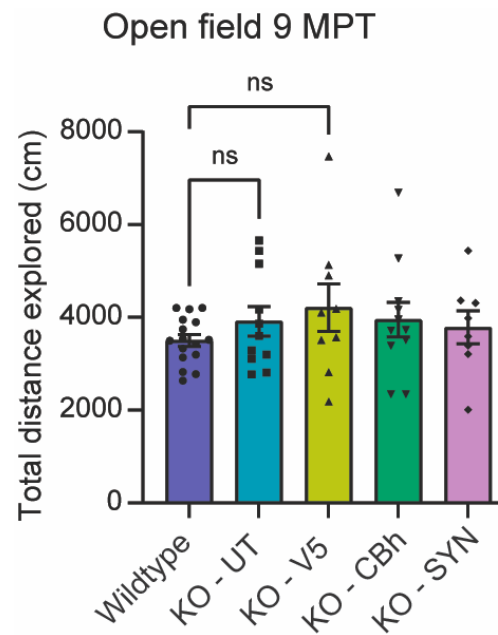

**Appendix Figure S2: Open field assessments and 9 months following treatment in neonatal mice demonstrates no significant difference between any of the treatment groups.** All data groups are males,  $n \geq 8$  per group. Data are presented as mean  $\pm$  SEM and are analysed by a one-way ANOVA with Tukey's multiple comparison test.

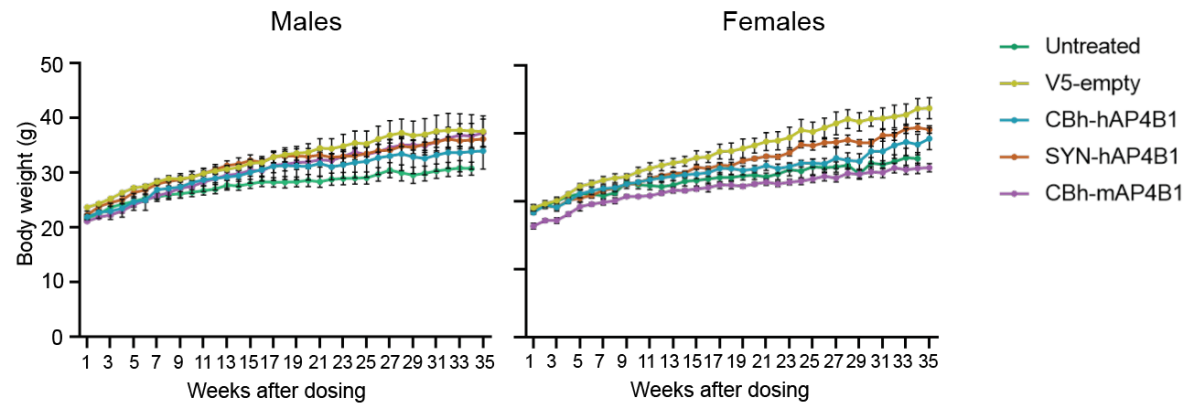

**Appendix Figure S3: Male and female weight gain plotted over 35 weeks.** Comparison of vectors used in the efficacy and safety studies.

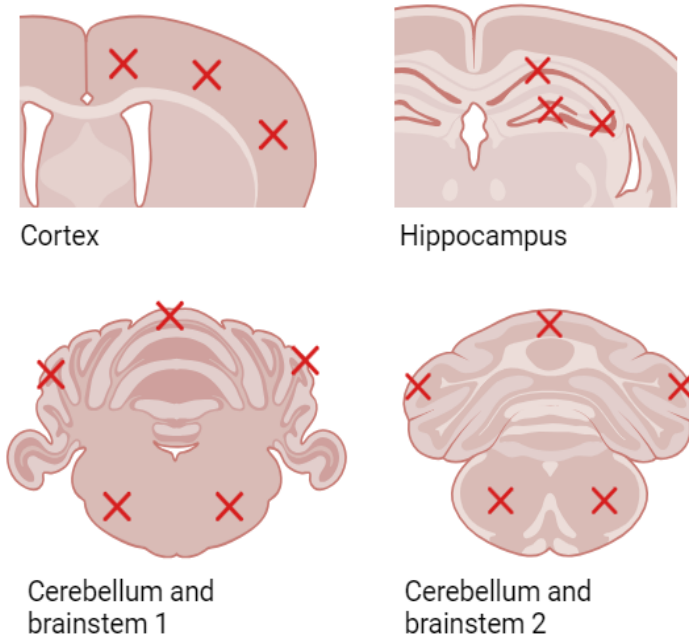

**Appendix Figure S4:** Immunofluorescent imaging areas within distinct anatomical regions for direct comparison of ATG9A accumulation at the TGN between treatment groups

**Appendix Table S1. Tabulated summary of results of a long-term mouse safety study.**

This study was designed to demonstrate the long-term safety of AAV9 vectors for AP4B1 gene therapy. A number of constructs expressing AP4B1 cDNAs from non-specific and cell specific promoters were compared by both intra cisterna magna and intravenous routes. The first table summarizes the study design and mortality. The subsequent tables summarize group averages and standard errors for haematology, serum chemistry and liver histopathology.

**List of Results**

|                            |    |
|----------------------------|----|
| Study design and mortality | 7  |
| Weight gain – Female       | 9  |
| Weight gain - Male         | 11 |
| Haematology at Day 28      | 13 |
| Haematology at 1 year      | 16 |
| Serum Chemistry at Day 28  | 18 |
| Serum Chemistry at 1-year  | 18 |
| Liver Histology Day 28     | 19 |
| Liver Histology at 1 year  | 21 |

| Study design and mortality                                                                                                                                                                                                                                                                                                                                                                                                                                                                                                                                                                              |       |                        |                         |             |                    |                         |                          |                                               |
|---------------------------------------------------------------------------------------------------------------------------------------------------------------------------------------------------------------------------------------------------------------------------------------------------------------------------------------------------------------------------------------------------------------------------------------------------------------------------------------------------------------------------------------------------------------------------------------------------------|-------|------------------------|-------------------------|-------------|--------------------|-------------------------|--------------------------|-----------------------------------------------|
| Group                                                                                                                                                                                                                                                                                                                                                                                                                                                                                                                                                                                                   | N     | Treatment <sup>1</sup> | Dose (genome copies/Kg) | Volume (μl) | Route <sup>2</sup> | <sup>3</sup> Sac Day 28 | <sup>4</sup> Sac day 365 | Mortality                                     |
| 1                                                                                                                                                                                                                                                                                                                                                                                                                                                                                                                                                                                                       | 6F/6M | Untreated              | NA                      | NA          | NA                 | 3F/3M                   | 3F/3M                    | None                                          |
| 2                                                                                                                                                                                                                                                                                                                                                                                                                                                                                                                                                                                                       | 6F/6M | AAV9/V5                | 3X10 <sup>12</sup>      | 3ul         | ICM                | 3F/3M                   | 3F/3M                    | None                                          |
| 3                                                                                                                                                                                                                                                                                                                                                                                                                                                                                                                                                                                                       | 6F/6M | AAV9/CBh-hAP4B1        | 3X10 <sup>12</sup>      | 3ul         | ICM                | 3F/3M                   | 3F/3M                    | 1F/ d241 <sup>5</sup><br>1M/ d80 <sup>6</sup> |
| 4                                                                                                                                                                                                                                                                                                                                                                                                                                                                                                                                                                                                       | 6F/6M | AAV9/pSYN-hAP4B1       | 3X10 <sup>12</sup>      | 3ul         | ICM                | 3F/3M                   | 3F/3M                    | None                                          |
| 5                                                                                                                                                                                                                                                                                                                                                                                                                                                                                                                                                                                                       | 6F/6M | AAV9/pAP4B1-hAP4B1     | 3X10 <sup>12</sup>      | 3ul         | ICM                | 3F/3M                   | 3F/3M                    | 1F/d266 <sup>5</sup>                          |
| 6                                                                                                                                                                                                                                                                                                                                                                                                                                                                                                                                                                                                       | 6F/6M | AAV9/pMep229-hAP4B1    | 3X10 <sup>12</sup>      | 3ul         | ICM                | 3F/3M                   | 3F/3M                    | 1F/d241 <sup>5</sup>                          |
| 7                                                                                                                                                                                                                                                                                                                                                                                                                                                                                                                                                                                                       | 6F/6M | AAV9/CBh-mAP4B1        | 3X10 <sup>12</sup>      | 3ul         | ICM                | 3F/3M                   | 3F/3M                    | None                                          |
| 8                                                                                                                                                                                                                                                                                                                                                                                                                                                                                                                                                                                                       | 8F/8M | AAV9/CBh-hAP4B1        | 3X10 <sup>13</sup>      | 300ul       | IV                 | 0                       | 5F/2M <sup>4</sup>       | None                                          |
| 9                                                                                                                                                                                                                                                                                                                                                                                                                                                                                                                                                                                                       | 8F/8M | AAV9/pSYN-hAP4B1       | 3X10 <sup>13</sup>      | 300ul       | IV                 | 0                       | 5F/2M <sup>4</sup>       | None                                          |
| <p><sup>1</sup> Mice were treated at age 5 weeks.</p> <p><sup>2</sup> ICM = intra-cisterna magna. IV =intravenous. NA – not applicable</p> <p><sup>3</sup> Interim sacrifice to assess CBC, serum chemistry, histopathology, gene expression</p> <p><sup>4</sup> At terminal sacrifice assessment included CBC, serum chemistry, histopathology</p> <p><sup>5</sup> Mice with dermatitis resulting from heterobarbering. Incalcitrant to treatment</p> <p><sup>6</sup> One mouse from undetermined cause. Failed to gain weight following injection. Humane sacrifice due to lethargy. No necropsy,</p> |       |                        |                         |             |                    |                         |                          |                                               |

| Weight gain - Female |              |                 |                        |                        |                         |                          |                         |                       |                       |
|----------------------|--------------|-----------------|------------------------|------------------------|-------------------------|--------------------------|-------------------------|-----------------------|-----------------------|
|                      | 1. Untreated | 2. ICM. AAV9/V5 | 3. ICM. AAV9/Cbh-AP4B1 | 4. ICM. AAV9/SYN-AP4B1 | 5. ICM. AAV9/pAP4-AP4B1 | 6. ICM. AAV9/pME P-AP4B1 | 7. ICM. AAV9/CBh-mAP4B1 | 8. IV. AAV9/Cbh-AP4B1 | 9. IV. AAV9/SYN-AP4B1 |
| Week 1               | 0 ± 0        | 0 ± 0           | 0.1 ± 0.05             | 0.2 ± 0.14             | 0 ± 0                   | 0 ± 0.05                 | 8.3 ± 0.1               | 0.1 ± 0.05            | 0.1 ± 0.08            |

| Weight gain - Female |              |                 |                        |                        |                         |                          |                         |                       |                       |
|----------------------|--------------|-----------------|------------------------|------------------------|-------------------------|--------------------------|-------------------------|-----------------------|-----------------------|
|                      | 1. Untreated | 2. ICM. AAV9/V5 | 3. ICM. AAV9/Cbh-AP4B1 | 4. ICM. AAV9/SYN-AP4B1 | 5. ICM. AAV9/pAP4-AP4B1 | 6. ICM. AAV9/pME P-AP4B1 | 7. ICM. AAV9/CBh-mAP4B1 | 8. IV. AAV9/Cbh-AP4B1 | 9. IV. AAV9/SYN-AP4B1 |
| Week 2               | 0 ± 0.02     | 0.6 ± 0.12      | 1.1 ± 0.23             | 1.1 ± 0.46             | 1.5 ± 0.31              | 0.5 ± 0.18               | 8.3 ± 0.35              | 0.2 ± 0.11            | 0.1 ± 0.07            |
| Week 3               | 0.4 ± 0.24   | 1 ± 0.24        | 0.8 ± 0.3              | 0.8 ± 0.27             | 1.5 ± 0.44              | 0.8 ± 0.36               | 8.3 ± 0.36              | 1.2 ± 0.28            | 1.3 ± 0.27            |
| Week 4               | 1.1 ± 0.19   | 2 ± 0.28        | 1.7 ± 0.2              | 1.9 ± 0.38             | 2.9 ± 0.25              | 1.2 ± 0.4                | 8.3 ± 0.37              | 2.3 ± 1.27            | 2 ± 0.6               |
| Week 5               | 1.8 ± 0.3    | 3.2 ± 0.1       | 2.8 ± 0.44             | 2.2 ± 0.48             | 3.7 ± 0.14              | 2.6 ± 0.59               | 8.3 ± 0.38              | 2.5 ± 0.4             | 2.6 ± 0.28            |
| Week 6               | 2.2 ± 0.23   | 3.6 ± 0.4       | 3.2 ± 0.42             | 2.6 ± 0.38             | 4.4 ± 0.29              | 2.8 ± 0.16               | 8.3 ± 0.25              | 3.5 ± 0.37            | 2.6 ± 0.13            |
| Week 7               | 2.1 ± 0.13   | 4.1 ± 0.51      | 3.6 ± 0.31             | 3.3 ± 0.46             | 4.7 ± 0.24              | 3.1 ± 0.41               | 8.3 ± 0.45              | 3.1 ± 0.49            | 2.9 ± 0.36            |
| Week 8               | 1.9 ± 0.12   | 4.4 ± 0.6       | 3.7 ± 0.39             | 3.6 ± 0.4              | 4.8 ± 0.26              | 3.2 ± 0.31               | 8.3 ± 0.46              | 3.2 ± 0.25            | 3.1 ± 0.22            |
| Week 9               | 2.3 ± 0.33   | 4.6 ± 0.35      | 4.2 ± 0.57             | 4.2 ± 0.26             | 5 ± 0.3                 | 3.9 ± 0.21               | 8.3 ± 0.27              | 3.6 ± 0.4             | 3.2 ± 0.22            |
| Week 10              | 3.9 ± 0.57   | 5.3 ± 0.44      | 4.5 ± 0.28             | 4.4 ± 0.14             | 5.4 ± 0.57              | 4.3 ± 0.29               | 8.3 ± 0.23              | 3.9 ± 0.39            | 3.6 ± 0.14            |
| Week 11              | 3.5 ± 0.2    | 5.8 ± 0.64      | 4.9 ± 0.29             | 5.1 ± 0.31             | 5.9 ± 0.3               | 4.1 ± 0.27               | 8.3 ± 0.26              | 4.7 ± 0.55            | 4.2 ± 0.91            |
| Week 12              | 3.4 ± 0.16   | 6.2 ± 0.55      | 5.1 ± 0.36             | 5.5 ± 0.2              | 6.2 ± 0.22              | 4.4 ± 0.24               | 8.3 ± 0.25              | 4.8 ± 0.34            | 4.5 ± 0.09            |
| Week 13              | 3.2 ± 0.17   | 6.6 ± 0.46      | 5.4 ± 0.45             | 5.8 ± 0.24             | 6.4 ± 0.24              | 4.8 ± 0.23               | 8.3 ± 0.28              | 4.9 ± 0.38            | 4.6 ± 0.11            |
| Week 14              | 3.5 ± 0.43   | 6.9 ± 0.7       | 5.6 ± 0.43             | 5.9 ± 0.27             | 6.4 ± 0.4               | 5.2 ± 0.55               | 8.3 ± 0.18              | 5 ± 0.59              | 4.7 ± 0.18            |
| Week 15              | 4 ± 0.28     | 7.4 ± 0.96      | 5.7 ± 0.54             | 6.7 ± 0.3              | 6.7 ± 0.29              | 5.4 ± 0.5                | 8.3 ± 0.32              | 5.1 ± 0.5             | 5.4 ± 0.23            |
| Week 16              | 4.2 ± 0.29   | 7.5 ± 0.77      | 5.9 ± 0.45             | 6.5 ± 0.3              | 7.2 ± 0.65              | 5.5 ± 0.32               | 8.3 ± 0.43              | 5.3 ± 0.88            | 5.4 ± 0.33            |
| Week 17              | 4.4 ± 0.47   | 8.3 ± 0.99      | 6.5 ± 0.68             | 7 ± 0.27               | 7.7 ± 0.67              | 5.9 ± 0.3                | 8.3 ± 0.43              | 5 ± 0.84              | 5.1 ± 0.3             |
| Week 18              | 4.6 ± 0.32   | 8.3 ± 1.23      | 6.5 ± 0.75             | 6.9 ± 0.21             | 7.7 ± 0.44              | 6.2 ± 0.56               | 8.3 ± 0.34              | 5.8 ± 0.67            | 5.6 ± 0.28            |
| Week 19              | 4.6 ± 0.36   | 8.8 ± 1.36      | 6.2 ± 0.53             | 7.7 ± 0.32             | 7.9 ± 0.49              | 5.9 ± 0.46               | 8.3 ± 0.25              | 5.5 ± 0.58            | 5.7 ± 0.24            |
| Week 20              | 4.8 ± 0.4    | 9.2 ± 1.02      | 6.4 ± 0.39             | 8 ± 0.26               | 8.6 ± 0.86              | 6 ± 0.45                 | 8.3 ± 0.3               | 5.9 ± 0.63            | 5.7 ± 0.35            |
| Week 21              | 4.9 ± 0.35   | 9.7 ± 1.2       | 6.9 ± 0.62             | 8.3 ± 0.2              | 9.2 ± 0.9               | 6.3 ± 0.35               | 8.3 ± 0.21              | 6.8 ± 0.52            | 6.1 ± 0.48            |
| Week 22              | 4.7 ± 0.32   | 9.9 ± 1.3       | 6.5 ± 0.53             | 8.3 ± 0.36             | 8.3 ± 0.79              | 6.6 ± 0.55               | 8.3 ± 0.35              | 6.7 ± 0.61            | 6.2 ± 0.47            |
| Week 23              | 5.1 ± 0.59   | 10.3 ± 1.39     | 6.8 ± 0.49             | 8.9 ± 0.42             | 9.2 ± 0.93              | 6.8 ± 0.51               | 8.3 ± 0.19              | 6.6 ± 0.47            | 6.2 ± 0.51            |
| Week 24              | 5.7 ± 0.48   | 11.4 ± 1.53     | 7.3 ± 0.35             | 10 ± 0.39              | 9.9 ± 1.36              | 7.4 ± 0.54               | 8.3 ± 0.47              | 7.4 ± 0.62            | 6.7 ± 0.58            |



| Weight gain - Female |              |                 |                        |                        |                         |                          |                         |                       |                       |
|----------------------|--------------|-----------------|------------------------|------------------------|-------------------------|--------------------------|-------------------------|-----------------------|-----------------------|
|                      | 1. Untreated | 2. ICM. AAV9/V5 | 3. ICM. AAV9/Cbh-AP4B1 | 4. ICM. AAV9/SYN-AP4B1 | 5. ICM. AAV9/pAP4-AP4B1 | 6. ICM. AAV9/pME P-AP4B1 | 7. ICM. AAV9/CBh-mAP4B1 | 8. IV. AAV9/Cbh-AP4B1 | 9. IV. AAV9/SYN-AP4B1 |
| Week 25              | 5.5 ± 0.77   | 11.2 ± 1.35     | 7.3 ± 0.52             | 9.9 ± 0.6              | 9.7 ± 1.27              | 7.3 ± 0.7                | 8.3 ± 0.3               | 7.3 ± 1.03            | 6.9 ± 0.58            |
| Week 26              | 6.2 ± 0.79   | 11.8 ± 1.32     | 7.2 ± 0.66             | 10.3 ± 0.53            | 10.5 ± 1.64             | 8.1 ± 0.82               | 8.3 ± 0.47              | 7.4 ± 0.94            | 7.5 ± 0.94            |
| Week 27              | 6 ± 0.44     | 12.4 ± 1.5      | 8 ± 1.41               | 10.4 ± 0.59            | 10.5 ± 1.74             | 8 ± 0.81                 | 8.3 ± 0.55              | 8.1 ± 0.89            | 8.3 ± 1.06            |
| Week 28              | 6.1 ± 0.43   | 13 ± 1.29       | 7.7 ± 1.03             | 10.7 ± 0.67            | 10.8 ± 1.61             | 8.3 ± 0.88               | 8.3 ± 0.46              | 8.1 ± 0.98            | 8.3 ± 0.73            |
| Week 29              | 6.4 ± 0.95   | 12.6 ± 1.26     | 7.6 ± 1.06             | 10.3 ± 0.45            | 10.1 ± 1.6              | 8.2 ± 0.77               | 8.3 ± 0.56              | 8 ± 1.05              | 8.9 ± 0.55            |
| Week 30              | 5.1 ± 0.2    | 13.1 ± 1.13     | 9.2 ± 1.3              | 10.3 ± 0.45            | 10.6 ± 1.63             | 8.8 ± 1.01               | 8.3 ± 0.68              | 8.1 ± 1.11            | 8.1 ± 0.98            |
| Week 31              | 6.7 ± 0.54   | 13.1 ± 1.44     | 9.3 ± 1.39             | 11.4 ± 0.78            | 10.8 ± 1.75             | 8.9 ± 1.13               | 8.3 ± 0.69              | 8.3 ± 0.86            | 7.6 ± 1.02            |
| Week32               | 6.5 ± 0.17   | 13.4 ± 1.52     | 10.1 ± 1.41            | 11.5 ± 0.72            | 11.8 ± 1.88             | 9.2 ± 0.88               | 8.7 ± 0.66              | 8.6 ± 1.03            | 8.2 ± 0.87            |
| Week 33              | 6.9 ± 0.58   | 13.7 ± 1.44     | 10.6 ± 1.47            | 12.4 ± 0.63            | 12.5 ± 2.24             | 9.2 ± 1.28               | 8.7 ± 0.63              | 9.4 ± 1.03            | 8.9 ± 0.94            |
| Week 34              | 7.5 ± 0.95   | 14.6 ± 1.32     | 10.3 ± 1.11            | 12.5 ± 0.57            | 12.9 ± 2.32             | 9.7 ± 1.1                | 8.7 ± 0.64              | 10.3 ± 1.24           | 9.3 ± 1.1             |
| Week 35              | 7.4 ± 0.47   | 14.6 ± 1.44     | 11.1 ± 1.15            | 12.3 ± 0.48            | 12.9 ± 2.4              | 9.9 ± 1.51               | 8.7 ± 0.54              | 10.1 ± 1.21           | 9.2 ± 1.14            |
| Week 36              | 8.2 ± 0.63   | 14.9 ± 1.34     | 11.1 ± 1.41            | 13.5 ± 0.48            | 13.4 ± 2.39             | 9.8 ± 1.15               | 8.7 ± 0.73              | 10.6 ± 1.46           | 9.4 ± 1.11            |
| Week 37              | 7.1 ± 0.53   | 14.2 ± 1.71     | 11.1 ± 1.08            | 12.5 ± 0.43            | 13 ± 2.27               | 9.7 ± 1.02               | 8.7 ± 0.63              | 11.2 ± 1.5            | 9.8 ± 1.03            |
| Week 38              | 8 ± 0.74     | 14.6 ± 1.51     | 11.8 ± 1.17            | 12.9 ± 0.48            | 13.2 ± 2.11             | 10.4 ± 1.05              | 8.7 ± 0.35              | 9.5 ± 1.25            | 9.4 ± 1.52            |

| Weight gain - Female |              |                 |                         |                         |                          |                          |                         |                        |                        |
|----------------------|--------------|-----------------|-------------------------|-------------------------|--------------------------|--------------------------|-------------------------|------------------------|------------------------|
|                      | 1. Untreated | 2. ICM. AAV9/V5 | 3. ICM. AAV9/Cbh -AP4B1 | 4. ICM. AAV9/SYN -AP4B1 | 5. ICM. AAV9/pAP 4-AP4B1 | 6. ICM. AAV9/pME P-AP4B1 | 7. ICM. AAV9/CBh-mAP4B1 | 8. IV. AAV9/Cbh -AP4B1 | 9. IV. AAV9/SYN -AP4B1 |
| Week 39              | 9.2 ± 1.02   | 15.5 ± 1.51     | 12.2 ± 1.34             | 12.7 ± 0.6              | 14 ± 2.49                | 10.3 ± 1.46              | 8.7 ± 0.62              | 10 ± 1.37              | 9.6 ± 1.26             |
| Week 40              | 8.3 ± 0.8    | 14.9 ± 0.72     | 12.9 ± 1.53             | 13.8 ± 0.65             | 13.7 ± 2.59              | 10.2 ± 1.27              | 8.7 ± 0.8               | 10.3 ± 1.44            | 10.1 ± 1.31            |
| Week 41              | 8.6 ± 0.81   | 16.2 ± 0.95     | 12.9 ± 2.02             | 14.3 ± 0.76             | 14.1 ± 2.81              | 11.7 ± 1.32              | 8.7 ± 0.91              | 11.1 ± 1.36            | 10.2 ± 1.25            |
| Week 42              | 9.4 ± 0.78   | 16.1 ± 1.45     | 13.8 ± 1.53             | 13.7 ± 1.08             | 14 ± 2.77                | 11.4 ± 1.11              | 8.7 ± 0.89              | 10.7 ± 1.36            | 10.4 ± 1.39            |
| Week 43              | 9.7 ± 0.71   | 16.6 ± 1.34     | 14.8 ± 1.62             | 14 ± 1.39               | 14.1 ± 2.82              | 11.3 ± 0.94              | 8.7 ± 0.96              | 11 ± 1.59              | 10.4 ± 1.23            |
| Week 44              | 9.9 ± 1.01   | 16.5 ± 1.3      | 14.1 ± 1.53             | 13.9 ± 1.3              | 13.8 ± 3.05              | 11.5 ± 0.91              | 8.7 ± 1.04              | 11.4 ± 1.3             | 10.4 ± 1.02            |
| Week 45              | 10.2 ± 0.55  | 17 ± 1.39       | 14.6 ± 1.53             | 14.1 ± 1.46             | 14.3 ± 3.3               | 11.8 ± 1.25              | 8.7 ± 1.16              | 11.3 ± 1.61            | 10.4 ± 1.17            |
| Week 46              | 9.5 ± 0.69   | 16.9 ± 1.44     | 14.8 ± 1.91             | 13.9 ± 1.07             | 14 ± 3.15                | 11.3 ± 1.5               | 8.7 ± 1.12              | 11.8 ± 1.85            | 10.4 ± 1.26            |
| Week 47              | 9.8 ± 0.58   | 16.8 ± 1.43     | 14.8 ± 1.69             | 13.9 ± 1.1              | 13.6 ± 3.03              | 11.4 ± 1.12              | 8.7 ± 1.2               | 10.7 ± 1.62            | 10.1 ± 1.21            |

| Weight gain - Male |              |                 |                         |                         |                          |                          |                         |                        |                        |
|--------------------|--------------|-----------------|-------------------------|-------------------------|--------------------------|--------------------------|-------------------------|------------------------|------------------------|
|                    | 1. Untreated | 2. ICM. AAV9/V5 | 3. ICM. AAV9/Cbh -AP4B1 | 4. ICM. AAV9/SYN -AP4B1 | 5. ICM. AAV9/pAP 4-AP4B1 | 6. ICM. AAV9/pME P-AP4B1 | 7. ICM. AAV9/CBh-mAP4B1 | 8. IV. AAV9/Cbh -AP4B1 | 9. IV. AAV9/SYN -AP4B1 |
| Week 1             | 0 ± 0        | 0 ± 0           | 0.9 ± 0.64              | 0 ± 0                   | 1.5 ± 1.26               | 0 ± 0                    | 0 ± 0                   | 0.2 ± 0                | 0 ± 0                  |
| Week 2             | 0 ± 0        | 0.7 ± 0.11      | 1.7 ± 0.75              | 1.6 ± 0.3               | 0.5 ± 0.32               | 0.7 ± 0.17               | 0.7 ± 0.12              | 0 ± 0                  | 0.5 ± 0                |
| Week 3             | 0.8 ± 0.31   | 1.6 ± 0.29      | 1.9 ± 1.14              | 2.3 ± 0.57              | 3.1 ± 1.49               | 1.2 ± 0.13               | 1.2 ± 0.24              | 1.7 ± 0                | 2.1 ± 0                |
| Week 4             | 2 ± 0.27     | 2.7 ± 0.06      | 2.5 ± 1.27              | 2.8 ± 0.37              | 3.8 ± 1.35               | 1.9 ± 0.41               | 1.9 ± 0.43              | 2.2 ± 0                | 2.8 ± 0                |
| Week 5             | 2.6 ± 0.21   | 3.5 ± 0.2       | 3.7 ± 1.21              | 4.2 ± 0.37              | 4.8 ± 1.28               | 2.7 ± 0.27               | 3 ± 0.57                | 3.4 ± 0                | 3.9 ± 0                |

| Weight gain - Male |              |                 |                        |                        |                         |                          |                         |                       |                       |
|--------------------|--------------|-----------------|------------------------|------------------------|-------------------------|--------------------------|-------------------------|-----------------------|-----------------------|
|                    | 1. Untreated | 2. ICM. AAV9/V5 | 3. ICM. AAV9/Cbh-AP4B1 | 4. ICM. AAV9/SYN-AP4B1 | 5. ICM. AAV9/pAP4-AP4B1 | 6. ICM. AAV9/pME P-AP4B1 | 7. ICM. AAV9/CBh-mAP4B1 | 8. IV. AAV9/Cbh-AP4B1 | 9. IV. AAV9/SYN-AP4B1 |
| Week 6             | 3.1 ± 0.35   | 3.8 ± 0.2       | 3.9 ± 1.46             | 4.6 ± 0.33             | 4.9 ± 1.37              | 3.4 ± 0.19               | 3.8 ± 0.5               | 3.5 ± 0               | 4.8 ± 0               |
| Week 7             | 3.7 ± 0.27   | 4.7 ± 0.33      | 5.6 ± 1.19             | 5.7 ± 0.19             | 6 ± 1.28                | 4.1 ± 0.35               | 4.7 ± 0.56              | 4.1 ± 0               | 4.8 ± 0               |
| Week 8             | 3.9 ± 0.39   | 5.2 ± 0.35      | 5.8 ± 1.53             | 6.2 ± 0.3              | 6.9 ± 1.22              | 4.5 ± 0.49               | 5.2 ± 0.62              | 4.9 ± 0               | 5.8 ± 0               |
| Week 9             | 4.3 ± 0.3    | 5.2 ± 0.44      | 6.1 ± 1.42             | 6.5 ± 0.38             | 7.3 ± 1.22              | 4.9 ± 0.58               | 6 ± 0.76                | 5.3 ± 0               | 6.4 ± 0               |
| Week 10            | 4.5 ± 0.48   | 5.5 ± 0.34      | 6.9 ± 1.41             | 7 ± 0.45               | 7.7 ± 1.05              | 5.3 ± 0.41               | 6.4 ± 0.71              | 5.9 ± 0               | 6.6 ± 0               |
| Week 11            | 4.8 ± 0.47   | 6.2 ± 0.26      | 7.4 ± 1.48             | 7.6 ± 0.4              | 8.4 ± 1.06              | 5.9 ± 0.67               | 7.2 ± 0.75              | 6.1 ± 0               | 6.7 ± 0               |
| Week 12            | 5.1 ± 0.45   | 6.6 ± 0.28      | 7.6 ± 1.47             | 8.3 ± 0.38             | 8.7 ± 1.09              | 6.4 ± 0.55               | 7.8 ± 0.88              | 6.9 ± 0               | 7.4 ± 0               |
| Week 13            | 5.4 ± 0.44   | 7 ± 0.44        | 7.9 ± 1.45             | 9.1 ± 0.4              | 9 ± 1.13                | 6.9 ± 0.45               | 8.4 ± 1.02              | 7.7 ± 0               | 7.7 ± 0               |
| Week 14            | 6.1 ± 0.49   | 7.3 ± 0.47      | 8.1 ± 1.27             | 9.4 ± 0.43             | 9.7 ± 1.06              | 7 ± 0.69                 | 8.6 ± 1.05              | 8.5 ± 0               | 8 ± 0                 |
| Week 15            | 6 ± 0.54     | 8.1 ± 0.68      | 8.8 ± 1.35             | 10 ± 0.45              | 10.1 ± 0.95             | 8.2 ± 0.66               | 9.3 ± 1.14              | 8.6 ± 0               | 8.8 ± 0               |
| Week 16            | 6.3 ± 0.53   | 8.2 ± 0.62      | 9.3 ± 1.44             | 9.7 ± 0.39             | 10.4 ± 1.1              | 8.3 ± 0.85               | 9.2 ± 1.07              | 8.6 ± 0               | 9.3 ± 0               |
| Week 17            | 6.7 ± 0.6    | 9.2 ± 0.94      | 9.9 ± 1.87             | 10.7 ± 0.45            | 11.2 ± 1.07             | 8.9 ± 0.92               | 10.2 ± 1.4              | 9.2 ± 0               | 9.5 ± 0               |
| Week 18            | 6.6 ± 0.59   | 9.6 ± 1.23      | 10 ± 1.82              | 10.8 ± 0.6             | 11.2 ± 0.91             | 9.3 ± 1.14               | 10.4 ± 1.27             | 9.4 ± 0               | 9.5 ± 0               |
| Week 19            | 6.6 ± 0.8    | 9.9 ± 1.23      | 9.9 ± 1.82             | 10.8 ± 0.81            | 11.6 ± 1.08             | 8.7 ± 1.08               | 10.7 ± 1.31             | 9.6 ± 0               | 9.6 ± 0               |
| Week 20            | 6.7 ± 0.69   | 10 ± 1.61       | 9.8 ± 1.77             | 10.7 ± 0.96            | 11.3 ± 0.98             | 8.8 ± 1.04               | 10.8 ± 1.26             | 4.7 ± 0               | 10.4 ± 0              |
| Week 21            | 6.9 ± 0.85   | 10.8 ± 1.77     | 10.4 ± 1.63            | 11 ± 0.99              | 11.6 ± 1.07             | 9.3 ± 1.08               | 11.2 ± 1.35             | 9.3 ± 0               | 9.5 ± 0               |
| Week 22            | 6.7 ± 0.77   | 10.7 ± 1.83     | 9.8 ± 1.7              | 10.6 ± 0.88            | 11.6 ± 0.96             | 9.2 ± 1.19               | 11.1 ± 1.35             | 9.8 ± 0               | 9.3 ± 0               |
| Week 23            | 7.2 ± 0.9    | 8.7 ± 3.58      | 10.1 ± 1.74            | 10.7 ± 0.57            | 11.5 ± 0.84             | 9.6 ± 1.28               | 11.9 ± 1.31             | 9.9 ± 0               | 9.5 ± 0               |
| Week 24            | 7.3 ± 0.86   | 11.7 ± 2.2      | 10.5 ± 2.07            | 10.9 ± 0.9             | 12.1 ± 1.18             | 10 ± 1.24                | 12.6 ± 1.41             | 10.3 ± 0              | 10.1 ± 0              |
| Week 25            | 7.4 ± 0.86   | 11.6 ± 2.32     | 10.7 ± 2.13            | 11.3 ± 0.94            | 12 ± 1.17               | 10 ± 1.46                | 12.2 ± 1.42             | 10.2 ± 0              | 9.9 ± 0               |
| Week 26            | 7.4 ± 0.77   | 12.5 ± 2.34     | 11.4 ± 2.3             | 11.8 ± 0.82            | 12.4 ± 1.07             | 11 ± 1.45                | 12.7 ± 1.39             | 10.4 ± 0              | 9.8 ± 0               |
| Week 27            | 8.1 ± 0.96   | 13.2 ± 2.67     | 11.7 ± 2.31            | 11.9 ± 0.83            | 12.9 ± 0.91             | 11 ± 1.32                | 13.4 ± 1.51             | 11.2 ± 0              | 10.7 ± 0              |

| Weight gain - Male |              |                 |                        |                        |                         |                          |                         |                       |                       |
|--------------------|--------------|-----------------|------------------------|------------------------|-------------------------|--------------------------|-------------------------|-----------------------|-----------------------|
|                    | 1. Untreated | 2. ICM. AAV9/V5 | 3. ICM. AAV9/Cbh-AP4B1 | 4. ICM. AAV9/SYN-AP4B1 | 5. ICM. AAV9/pAP4-AP4B1 | 6. ICM. AAV9/pME P-AP4B1 | 7. ICM. AAV9/CBh-mAP4B1 | 8. IV. AAV9/Cbh-AP4B1 | 9. IV. AAV9/SYN-AP4B1 |
| Week 28            | 8.8 ± 1.18   | 13.6 ± 2.47     | 12.1 ± 2.29            | 12.6 ± 0.82            | 13.6 ± 0.69             | 11.2 ± 1.27              | 13.9 ± 1.64             | 11.8 ± 0              | 11 ± 0                |
| Week 29            | 8.3 ± 1.29   | 13.1 ± 2.64     | 11.6 ± 2.27            | 12.4 ± 0.97            | 13.4 ± 0.73             | 10.7 ± 1.29              | 13.9 ± 1.61             | 11.6 ± 0              | 11.8 ± 0              |
| Week 30            | 7.9 ± 1.28   | 13.3 ± 2.87     | 11.3 ± 2.22            | 13 ± 1.01              | 13.5 ± 0.66             | 10.7 ± 1.56              | 13.8 ± 1.72             | 11.4 ± 0              | 11.3 ± 0              |
| Week 31            | 8.2 ± 1.2    | 13.9 ± 2.91     | 11.9 ± 2.17            | 13.4 ± 1.09            | 13.9 ± 0.66             | 11.2 ± 1.6               | 14.5 ± 1.93             | 10.9 ± 0              | 11 ± 0                |
| Week 32            | 8.6 ± 1.14   | 14 ± 3.1        | 4.2 ± 8.3              | 13.9 ± 1.08            | 14 ± 0.74               | 11.6 ± 1.47              | 15.2 ± 2.03             | 11.3 ± 0              | 5.8 ± 0               |
| Week 33            | 9 ± 1.09     | 14.1 ± 2.96     | 4.2 ± 8.4              | 13.6 ± 1.22            | 13.7 ± 0.75             | 11.5 ± 1.76              | 15.7 ± 2.1              | 12.9 ± 0              | 12.3 ± 0              |
| Week 34            | 9.2 ± 1.18   | 13.9 ± 2.97     | 4.4 ± 8.4              | 13.7 ± 1.43            | 13.8 ± 0.88             | 12 ± 1.71                | 15.6 ± 2.31             | 12.4 ± 0              | 11.9 ± 0              |
| Week 35            | 9.1 ± 0.97   | 13.8 ± 2.83     | 4.5 ± 8.44             | 13.9 ± 1.24            | 14.2 ± 0.81             | 12.1 ± 1.7               | 16.1 ± 2.56             | 12.2 ± 0              | 12.2 ± 0              |
| Week 36            | 9.7 ± 1.05   | 14.1 ± 2.77     | 4.4 ± 8.46             | 14.2 ± 1.26            | 13.9 ± 0.98             | 11.7 ± 1.9               | 16.5 ± 2.82             | 12.4 ± 0              | 12.4 ± 0              |
| Week 37            | 9.9 ± 1.14   | 14.4 ± 2.84     | 4.3 ± 8.46             | 13.9 ± 1.22            | 13.6 ± 1.1              | 11.6 ± 1.68              | 16.3 ± 2.87             | 11.7 ± 0              | 12.4 ± 0              |
| Week 38            | 10.9 ± 1.11  | 15.1 ± 2.94     | 4.4 ± 8.5              | 14.5 ± 1.19            | 13.9 ± 1.1              | 12.3 ± 1.72              | 16.8 ± 3                | 11.5 ± 0              | 10.5 ± 0              |
| Week 39            | 9.3 ± 1.08   | 15.6 ± 2.99     | 4.5 ± 8.5              | 15.1 ± 1.45            | 14.5 ± 1.3              | 13 ± 1.77                | 17.6 ± 2.94             | 11.5 ± 0              | 11.9 ± 0              |
| Week 40            | 9.4 ± 1.22   | 15.2 ± 3.12     | 4.8 ± 8.6              | 14.6 ± 1.42            | 14.3 ± 1.09             | 13.2 ± 1.97              | 17.3 ± 3.14             | 12.4 ± 0              | 13 ± 0                |
| Week 41            | 10 ± 1.33    | 15.5 ± 3.04     | 5 ± 8.65               | 15.4 ± 1.35            | 14.8 ± 1.05             | 13.3 ± 1.92              | 16.1 ± 2.33             | 12.3 ± 0              | 13 ± 0                |

| <b>Weight gain - Male</b> |                     |                        |                               |                               |                                |                                |                                |                              |                              |
|---------------------------|---------------------|------------------------|-------------------------------|-------------------------------|--------------------------------|--------------------------------|--------------------------------|------------------------------|------------------------------|
|                           | <b>1. Untreated</b> | <b>2. ICM. AAV9/V5</b> | <b>3. ICM. AAV9/Cbh-AP4B1</b> | <b>4. ICM. AAV9/SYN-AP4B1</b> | <b>5. ICM. AAV9/pAP4-AP4B1</b> | <b>6. ICM. AAV9/pMEP-AP4B1</b> | <b>7. ICM. AAV9/CBh-mAP4B1</b> | <b>8. IV. AAV9/Cbh-AP4B1</b> | <b>9. IV. AAV9/SYN-AP4B1</b> |
| Week 42                   | 9.9 ± 1.21          | 15.8 ± 3.14            | 5.4 ± 8.8                     | 15.5 ± 1.34                   | 15.4 ± 1.19                    | 13.5 ± 1.94                    | 16.3 ± 2.76                    | 12.2 ± 0                     | 13.3 ± 0                     |
| Week 43                   | 9.2 ± 1.48          | 16.2 ± 3.44            | 5.5 ± 8.86                    | 15.6 ± 1.65                   | 15.4 ± 1.21                    | 13.2 ± 2                       | 16.4 ± 2.63                    | 11.6 ± 0                     | 13.7 ± 0                     |
| Week 44                   | 9.3 ± 1.1           | 16.4 ± 3.65            | 5.3 ± 8.86                    | 15.3 ± 1.37                   | 15.7 ± 1.29                    | 13.4 ± 2.01                    | 16 ± 2.26                      | 12.2 ± 0                     | 13.4 ± 0                     |
| Week 45                   | 10 ± 1.08           | 16.7 ± 3.65            | 5.6 ± 8.91                    | 15.7 ± 1.07                   | 15.5 ± 1.12                    | 14 ± 2.06                      | 16.2 ± 2.42                    | 11.3 ± 0                     | 12.8 ± 0                     |
| Week 46                   | 9.8 ± 1.01          | 16.5 ± 3.64            | 5 ± 8.73                      | 15.5 ± 1.27                   | 15.5 ± 1.25                    | 13.5 ± 2.48                    | 16.3 ± 2.69                    | 11.6 ± 0                     | 13 ± 0                       |
| Week 47                   | 9.6 ± 1.27          | 16.4 ± 3.4             | 5.1 ± 8.72                    | 15.6 ± 1.22                   | 15 ± 1.14                      | 13.6 ± 2.28                    | 15.9 ± 2.99                    | 11.5 ± 0                     | 13 ± 0                       |

| <b>Hematology at Day 28</b> |                     |                   |                           |                           |                            |                           |                           |
|-----------------------------|---------------------|-------------------|---------------------------|---------------------------|----------------------------|---------------------------|---------------------------|
|                             | <b>1. Untreated</b> | <b>2. ICM. V5</b> | <b>3. ICM. CBh-hAP4B1</b> | <b>4. ICM. SYN-hAP4B1</b> | <b>5. ICM. AP4B1-AP4B1</b> | <b>6. ICM. MEP-hAP4B1</b> | <b>7. ICM. Cbh-mAP4B1</b> |
| WBC x10 <sup>3</sup> /uL    | 5.2 ± 0.39          | 5.8 ± 0.7         | 6.4 ± 0.41                | 6.7 ± 0.85                | 6.5 ± 0.51                 | 6.1 ± 0.59                | 6.1 ± 0.68                |
| RBC x10 <sup>6</sup> /uL    | 10.5 ± 0.24         | 10.3 ± 0.15       | 10.3 ± 0.25               | 10.5 ± 0.42               | 10.4 ± 0.33                | 10.3 ± 0.06               | 10.3 ± 0.27               |
| HGB g/dL                    | 15.4 ± 0.33         | 15.1 ± 0.26       | 14.9 ± 0.33               | 15.2 ± 0.53               | 15 ± 0.41                  | 14.9 ± 0.14               | 14.9 ± 0.27               |
| HCT %                       | 51.1 ± 1.09         | 50.4 ± 0.85       | 50.1 ± 1.24               | 50.9 ± 1.98               | 50.4 ± 1.6                 | 49.8 ± 0.36               | 50 ± 1.09                 |
| MCV fL                      | 48.6 ± 0.24         | 48.7 ± 0.29       | 48.5 ± 0.53               | 48.5 ± 0.25               | 48.5 ± 0.13                | 48.4 ± 0.37               | 48.7 ± 0.65               |
| MCH pg                      | 14.6 ± 0.06         | 14.6 ± 0.09       | 14.5 ± 0.05               | 14.4 ± 0.13               | 14.4 ± 0.07                | 14.5 ± 0.11               | 14.5 ± 0.22               |
| MCHC g/dL                   | 30 ± 0.19           | 29.9 ± 0.03       | 29.8 ± 0.31               | 29.8 ± 0.16               | 29.7 ± 0.15                | 29.8 ± 0.2                | 29.8 ± 0.17               |
| RDW %                       | 17 ± 0.15           | 17 ± 0.17         | 17 ± 0.3                  | 17.1 ± 0.43               | 17.1 ± 0.33                | 16.9 ± 0.04               | 16.8 ± 0.28               |

| <b>Hematology at Day 28</b>        |                     |                   |                           |                           |                            |                           |                           |
|------------------------------------|---------------------|-------------------|---------------------------|---------------------------|----------------------------|---------------------------|---------------------------|
|                                    | <b>1. Untreated</b> | <b>2. ICM. V5</b> | <b>3. ICM. Cbh-hAP4B1</b> | <b>4. ICM. SYN-hAP4B1</b> | <b>5. ICM. AP4B1-AP4B1</b> | <b>6. ICM. MEP-hAP4B1</b> | <b>7. ICM. Cbh-mAP4B1</b> |
| PLT x10 <sup>3</sup> /uL           | 1041 ± 187          | 1135 ± 230        | 1122 ± 163                | 1068 ± 266                | 1049 ± 182                 | 864 ± 51                  | 877 ± 106                 |
| MPV fL                             | 7 ± 0.09            | 7 ± 0.11          | 7 ± 0.05                  | 6.9 ± 0.07                | 6.9 ± 0.08                 | 7 ± 0.03                  | 7.1 ± 0.04                |
| %NEUT                              | 7.9 ± 1.61          | 6.6 ± 2.06        | 6.6 ± 0.8                 | 6.7 ± 2.02                | 7.1 ± 0.59                 | 9.1 ± 0.93                | 9.2 ± 0.9                 |
| %LYMPH                             | 86 ± 2.46           | 87 ± 2.31         | 86.2 ± 1.27               | 86.3 ± 2.92               | 85.5 ± 1.64                | 82.7 ± 1.03               | 82.8 ± 1.13               |
| %MONO                              | 3.6 ± 0.62          | 3.9 ± 0.62        | 4.4 ± 0.53                | 4.3 ± 0.55                | 4.5 ± 1.37                 | 4.9 ± 0.2                 | 4.7 ± 0.61                |
| %EOS                               | 1.5 ± 0.23          | 1.7 ± 0.36        | 2 ± 0.21                  | 1.9 ± 0.3                 | 2.1 ± 0.26                 | 2.2 ± 0.35                | 2.2 ± 0.24                |
| %BASO                              | 1.2 ± 0.32          | 0.8 ± 0.24        | 0.9 ± 0.1                 | 0.8 ± 0.38                | 0.9 ± 0.21                 | 1.1 ± 0.13                | 1.1 ± 0.17                |
| %RETIC                             | 3.7 ± 0.05          | 3.6 ± 0.13        | 3.5 ± 0.16                | 3.4 ± 0.16                | 3.5 ± 0.08                 | 3.4 ± 0.11                | 3.4 ± 0.09                |
| #RETIC<br>10 <sup>9</sup> cells/L  | 391 ± 10            | 372 ± 16          | 361 ± 15                  | 359 ± 19                  | 359 ± 20                   | 350 ± 9                   | 350 ± 11                  |
| #NEUT<br>10 <sup>3</sup> cells/ul  | 0.4 ± 0.06          | 0.4 ± 0.07        | 0.4 ± 0.07                | 0.5 ± 0.07                | 0.5 ± 0.05                 | 0.5 ± 0.05                | 0.5 ± 0.05                |
| #LYMPH<br>10 <sup>3</sup> cells/ul | 4.5 ± 0.41          | 5.1 ± 0.61        | 5.5 ± 0.38                | 5.8 ± 0.79                | 5.5 ± 0.43                 | 5.1 ± 0.57                | 5.1 ± 0.6                 |
| #MONO<br>10 <sup>3</sup> cells/ul  | 0.18 ± 0.03         | 0.24 ± 0.07       | 0.3 ± 0.06                | 0.3 ± 0.05                | 0.3 ± 0.09                 | 0.3 ± 0.04                | 0.3 ± 0.07                |
| #EOS<br>10 <sup>3</sup> cells/ul   | 0.1 ± 0.01          | 0.1 ± 0.04        | 0.1 ± 0.02                | 0.1 ± 0.02                | 0.1 ± 0.02                 | 0.1 ± 0.03                | 0.1 ± 0.03                |
| #BASO<br>10 <sup>3</sup> cells/ul  | 0.1 ± 0.01          | 0 ± 0.01          | 0.1 ± 0.01                | 0.1 ± 0.01                | 0.1 ± 0.01                 | 0.1 ± 0.01                | 0.1 ± 0.01                |
| LCR %                              | 5.2 ± 0.48          | 4.7 ± 0.54        | 4.6 ± 0.37                | 4.4 ± 0.58                | 4.4 ± 0.47                 | 4.6 ± 0.16                | 4.8 ± 0.22                |
| NRBC#<br>10 <sup>3</sup> cells/ul  | 0 ± 0.01            | 0 ± 0             | 0 ± 0.01                  | 0 ± 0.01                  | 0 ± 0.01                   | 0 ± 0.01                  | 0 ± 0.01                  |
| NRBC% %                            | 0.2 ± 0.12          | 0.2 ± 0.07        | 0.3 ± 0.16                | 0.3 ± 0.13                | 0.3 ± 0.07                 | 0.4 ± 0.11                | 0.3 ± 0.15                |

| <b>Hematology at Day 28</b> |                     |                   |                           |                           |                            |                           |                           |
|-----------------------------|---------------------|-------------------|---------------------------|---------------------------|----------------------------|---------------------------|---------------------------|
|                             | <b>1. Untreated</b> | <b>2. ICM. V5</b> | <b>3. ICM. CBh-hAP4B1</b> | <b>4. ICM. SYN-hAP4B1</b> | <b>5. ICM. AP4B1-AP4B1</b> | <b>6. ICM. MEP-hAP4B1</b> | <b>7. ICM. Cbh-mAP4B1</b> |
| RET-HE 0                    | 18 ± 0.05           | 17.9 ± 0.11       | 17.9 ± 0.13               | 18 ± 0.14                 | 18 ± 0.13                  | 18 ± 0.1                  | 18.1 ± 0.34               |
| IRF %                       | 57.7 ± 1.63         | 57.6 ± 1.6        | 57.7 ± 1.21               | 55.8 ± 1.45               | 56.2 ± 1.13                | 55.7 ± 0.95               | 55.5 ± 1.08               |
| RDW-SD 0                    | 23 ± 0.34           | 23.4 ± 0.37       | 23.4 ± 1.31               | 23.1 ± 0.43               | 23.3 ± 0.34                | 23.1 ± 0.21               | 23.2 ± 0.32               |
| LFR %                       | 42.3 ± 1.63         | 42.4 ± 1.6        | 42.3 ± 1.21               | 44.2 ± 1.45               | 43.8 ± 1.13                | 44.3 ± 0.95               | 44.5 ± 1.08               |
| MFR %                       | 19.6 ± 0.44         | 19.6 ± 0.56       | 19.4 ± 0.5                | 19.8 ± 0.32               | 20 ± 0.41                  | 20.4 ± 0.51               | 19.8 ± 0.96               |
| HFR %                       | 38.2 ± 1.88         | 38 ± 1.8          | 38.3 ± 0.76               | 36.1 ± 1.26               | 36.2 ± 1.29                | 35.3 ± 1.14               | 35.7 ± 1.51               |
| IPF %                       | 0.2 ± 0.05          | 0.2 ± 0.03        | 0.2 ± 0.02                | 0.2 ± 0.26                | 0.2 ± 0.02                 | 0.2 ± 0.02                | 0.2 ± 0.02                |
| PLT-I 10 <sup>3</sup> /uL   | 1426 ± 296          | 1538 ± 333        | 1534 ± 412                | 1467 ± 370                | 1442 ± 274                 | 1174 ± 75                 | 1207 ± 166                |
| PLT-O 10 <sup>3</sup> /uL   | 998 ± 182           | 1106 ± 213        | 1100 ± 150                | 1059 ± 250                | 1039 ± 171                 | 867 ± 50                  | 879 ± 103                 |
| PLT-F 10 <sup>3</sup> /uL   | 1041 ± 187          | 1135 ± 230        | 1122 ± 163                | 1068 ± 266                | 1049 ± 182                 | 864 ± 51                  | 877 ± 106                 |
| PCT %                       | 1 ± 0.2             | 1.1 ± 0.23        | 1.1 ± 0.3                 | 1 ± 0.25                  | 1 ± 0.19                   | 0.8 ± 0.05                | 0.8 ± 0.12                |
| PDW fL                      | 7.2 ± 0.14          | 7.2 ± 0.16        | 7.3 ± 0.1                 | 7.3 ± 0.17                | 7.3 ± 0.13                 | 7.4 ± 0.06                | 7.5 ± 0.11                |

| <b>Hematology at 1 year</b>           |                         |                            |                                        |                                        |                                         |                                         |                                         |                                       |                                       |
|---------------------------------------|-------------------------|----------------------------|----------------------------------------|----------------------------------------|-----------------------------------------|-----------------------------------------|-----------------------------------------|---------------------------------------|---------------------------------------|
|                                       | <b>1.<br/>Untreated</b> | <b>2. ICM.<br/>AAV9/V5</b> | <b>3. ICM.<br/>AAV9/CBh<br/>-AP4B1</b> | <b>4. ICM.<br/>AAV9/SYN<br/>-AP4B1</b> | <b>5. ICM.<br/>AAV9/pAP<br/>4-AP4B1</b> | <b>6. ICM.<br/>AAV9/pM<br/>EP-AP4B1</b> | <b>7. ICM.<br/>AAV9/CBh<br/>-mAP4B1</b> | <b>8. IV.<br/>AAV9/Cbh<br/>-AP4B1</b> | <b>9. IV.<br/>AAV9/SYN<br/>-AP4B1</b> |
| WBC<br>x10 <sup>3</sup> /uL           | 4.3 ± 0.37              | 6.4 ± 1.47                 | 6.4 ± 0.55                             | 7.6 ± 0.97                             | 7.7 ± 1.45                              | 9.6 ± 1.53                              | 6.1 ± 1.3                               | 5.1 ± 1.28                            | 8.6 ± 1.51                            |
| RBC<br>x10 <sup>6</sup> /uL           | 10.2 ± 0.17             | 10.2 ± 0.11                | 10 ± 0.08                              | 9.9 ± 0.24                             | 10.1 ± 0.25                             | 10.0 ± 0.3                              | 10.4 ± 0.28                             | 9.7 ± 0.73                            | 11.0 ± 0.17                           |
| HGB g/dL                              | 14.3 ± 0.08             | 14.3 ± 0.14                | 14.2 ± 0.15                            | 13.7 ± 0.34                            | 14.1 ± 0.32                             | 13.9 ± 0.24                             | 14.7 ± 0.38                             | 13.5 ± 0.91                           | 14.8 ± 0.14                           |
| HCT %                                 | 48.2 ± 0.41             | 48.6 ± 0.54                | 48.2 ± 0.41                            | 47.2 ± 1.11                            | 48.3 ± 1.06                             | 47.9 ± 0.76                             | 49.1 ± 1.36                             | 45.9 ± 2.64                           | 50.5 ± 0.51                           |
| MCV fL                                | 47.6 ± 0.53             | 47.7 ± 0.17                | 48.2 ± 0.38                            | 47.4 ± 0.28                            | 47.6 ± 0.46                             | 48.1 ± 0.88                             | 47.1 ± 0.26                             | 47.7 ± 1.3                            | 46.0 ± 0.29                           |
| MCH pg                                | 14.1 ± 0.18             | 14.1 ± 0.08                | 14.2 ± 0.11                            | 13.8 ± 0.09                            | 13.9 ± 0.14                             | 14.0 ± 0.24                             | 14.1 ± 0.09                             | 14.0 ± 0.22                           | 13.5 ± 0.1                            |
| MCHC g/dL                             | 29.7 ± 0.11             | 29.5 ± 0.07                | 29.5 ± 0.14                            | 29.0 ± 0.05                            | 29.1 ± 0.08                             | 29.0 ± 0.11                             | 29.9 ± 0.1                              | 29.4 ± 0.45                           | 29.4 ± 0.09                           |
| RDW %                                 | 17.4 ± 0.28             | 17.3 ± 0.15                | 17.3 ± 0.22                            | 17.4 ± 0.18                            | 17.5 ± 0.21                             | 18.1 ± 0.55                             | 17.9 ± 0.28                             | 17.8 ± 0.36                           | 18.4 ± 0.29                           |
| PLT<br>x10 <sup>3</sup> /uL           | 1710 ± 158              | 1545 ± 73                  | 1547 ± 101                             | 1593 ± 93                              | 1710 ± 96                               | 1442 ± 210                              | 1649 ± 96                               | 1616 ± 310                            | 1887 ± 126                            |
| MPV fL                                | 7.1 ± 0.08              | 7.2 ± 0.05                 | 7.2 ± 0.04                             | 7.3 ± 0.09                             | 7.2 ± 0.06                              | 7.7 ± 0.49                              | 7.2 ± 0.05                              | 7.6 ± 0.51                            | 6.9 ± 0.08                            |
| %NEUT                                 | 15.8 ± 1.6              | 14.7 ± 1.25                | 10.8 ± 0.8                             | 9.9 ± 0.86                             | 12 ± 1.19                               | 12.1 ± 2.3                              | 12.8 ± 1.52                             | 17.8 ± 3.13                           | 11.6 ± 1.48                           |
| %LYMPH                                | 76.5 ± 1.83             | 79.9 ± 1.36                | 83.1 ± 1                               | 84.5 ± 1.12                            | 81.8 ± 1.95                             | 81.5 ± 3.45                             | 81.3 ± 1.89                             | 72.4 ± 5.43                           | 83.4 ± 1.81                           |
| %MONO                                 | 4.4 ± 0.56              | 3.5 ± 0.44                 | 4.0 ± 0.41                             | 3.7 ± 0.42                             | 3.9 ± 0.64                              | 4.6 ± 1.2                               | 4.0 ± 0.39                              | 6.0 ± 2.54                            | 2.9 ± 0.26                            |
| %EOS                                  | 2.3 ± 0.42              | 1.3 ± 0.16                 | 1.7 ± 0.15                             | 1.5 ± 0.13                             | 1.9 ± 0.25                              | 1.7 ± 0.26                              | 1.4 ± 0.23                              | 3.2 ± 1.5                             | 1.9 ± 0.23                            |
| %BASO                                 | 1.0 ± 0.37              | 0.5 ± 0.05                 | 0.5 ± 0.08                             | 0.4 ± 0.08                             | 0.4 ± 0.08                              | 0.2 ± 0.05                              | 0.5 ± 0.07                              | 0.6 ± 0.12                            | 0.3 ± 0.09                            |
| %RETIC                                | 3.2 ± 0.14              | 3.6 ± 0.1                  | 3.9 ± 0.12                             | 3.8 ± 0.13                             | 4.2 ± 0.35                              | 5.4 ± 1.51                              | 3.7 ± 0.09                              | 6.9 ± 3.19                            | 3.6 ± 0.06                            |
| #RETIC<br>10 <sup>9</sup> cells/L     | 328 ± 14                | 372 ± 12                   | 387 ± 12                               | 374 ± 17                               | 417 ± 25                                | 510 ± 118                               | 388 ± 15                                | 535 ± 148                             | 400 ± 10                              |
| #NEUT<br>10 <sup>3</sup> cells/<br>ul | 0.7 ± 0.1               | 0.9 ± 0.16                 | 0.7 ± 0.07                             | 0.7 ± 0.04                             | 0.8 ± 0.08                              | 1.2 ± 0.39                              | 0.7 ± 0.07                              | 0.8 ± 0.17                            | 1.0 ± 0.19                            |



| <b>Hematology at 1 year</b>            |                         |                            |                                        |                                        |                                         |                                         |                                         |                                       |                                       |
|----------------------------------------|-------------------------|----------------------------|----------------------------------------|----------------------------------------|-----------------------------------------|-----------------------------------------|-----------------------------------------|---------------------------------------|---------------------------------------|
|                                        | <b>1.<br/>Untreated</b> | <b>2. ICM.<br/>AAV9/V5</b> | <b>3. ICM.<br/>AAV9/CBh<br/>-AP4B1</b> | <b>4. ICM.<br/>AAV9/SYN<br/>-AP4B1</b> | <b>5. ICM.<br/>AAV9/pAP<br/>4-AP4B1</b> | <b>6. ICM.<br/>AAV9/pM<br/>EP-AP4B1</b> | <b>7. ICM.<br/>AAV9/CBh<br/>-mAP4B1</b> | <b>8. IV.<br/>AAV9/Cbh<br/>-AP4B1</b> | <b>9. IV.<br/>AAV9/SYN<br/>-AP4B1</b> |
| #LYMPH<br>10 <sup>3</sup> cells/<br>ul | 3.3 ± 0.3               | 5.2 ± 1.24                 | 5.3 ± 0.49                             | 6.5 ± 0.92                             | 6.5 ± 1.36                              | 7.8 ± 1.22                              | 5.1 ± 1.19                              | 3.9 ± 1.16                            | 7.3 ± 1.3                             |
| #MONO<br>10 <sup>3</sup> cells/<br>ul  | 0.18 ± 0.02             | 0.23 ± 0.05                | 0.25 ± 0.02                            | 0.25 ± 0.02                            | 0.26 ± 0.03                             | 0.43 ± 0.17                             | 0.24 ± 0.04                             | 0.32 ± 0.14                           | 0.23 ± 0.03                           |
| #EOS<br>10 <sup>3</sup> cells/<br>ul   | 0.1 ± 0.02              | 0.09 ± 0.02                | 0.11 ± 0.01                            | 0.12 ± 0.02                            | 0.14 ± 0.02                             | 0.14 ± 0.02                             | 0.09 ± 0.02                             | 0.14 ± 0.05                           | 0.15 ± 0.03                           |
| #BASO<br>10 <sup>3</sup> cells/<br>ul  | 0.04 ± 0.02             | 0.04 ± 0.01                | 0.03 ± 0                               | 0.03 ± 0                               | 0.02 ± 0                                | 0.02 ± 0.01                             | 0.03 ± 0                                | 0.02 ± 0                              | 0.022 ± 0                             |
| LCR %                                  | 5.6 ± 0.3               | 6.5 ± 0.27                 | 5.9 ± 0.27                             | 7.4 ± 0.86                             | 6.1 ± 0.29                              | 10.7 ± 4.24                             | 6.4 ± 0.2                               | 9.5 ± 3.84                            | 5.5 ± 0.61                            |
| NRBC#<br>10 <sup>3</sup> cells/<br>ul  | 0.02 ± 0                | 0.01 ± 0                   | 0.02 ± 0.01                            | 0 ± 0                                  | 0.01 ± 0                                | 0.02 ± 0.02                             | 0 ± 0                                   | 0.03 ± 0.02                           | 0 ± 0                                 |
| NRBC% %                                | 0.35 ± 0.06             | 0.15 ± 0.07                | 0.4 ± 0.14                             | 0.08 ± 0.06                            | 0.05 ± 0.03                             | 0.17 ± 0.11                             | 0.05 ± 0.04                             | 0.63 ± 0.43                           | 0 ± 0                                 |
| RET-HE 0                               | 17.7 ± 0.32             | 17.7 ± 0.13                | 17.7 ± 0.13                            | 17.1 ± 0.1                             | 17.4 ± 0.17                             | 17.2 ± 0.14                             | 17.7 ± 0.14                             | 17.2 ± 0.25                           | 17 ± 0.19                             |
| IRF %                                  | 52.3 ± 1.03             | 56.4 ± 1.13                | 60 ± 1.21                              | 57.7 ± 0.65                            | 60.6 ± 1.3                              | 59.1 ± 2.43                             | 54.5 ± 1.48                             | 58.6 ± 3.36                           | 56.3 ± 0.83                           |
| RDW-SD 0                               | 23.9 ± 0.32             | 24.2 ± 0.29                | 24.4 ± 0.54                            | 24.4 ± 0.55                            | 23.8 ± 0.26                             | 25.5 ± 1.62                             | 24.0 ± 0.2                              | 25.6 ± 1.99                           | 23.5 ± 0.31                           |
| LFR %                                  | 47.8 ± 1.03             | 43.6 ± 1.13                | 40.0 ± 1.21                            | 42.3 ± 0.65                            | 39.4 ± 1.3                              | 41.0 ± 2.43                             | 45.5 ± 1.48                             | 41.4 ± 3.36                           | 43.7 ± 0.83                           |
| MFR %                                  | 18.0 ± 0.4              | 17.4 ± 0.49                | 16.9 ± 0.11                            | 17.9 ± 0.87                            | 16.3 ± 0.51                             | 16.4 ± 0.67                             | 16.9 ± 0.39                             | 15.4 ± 0.47                           | 18.3 ± 0.28                           |
| HFR %                                  | 34.3 ± 1.02             | 39.0 ± 1.6                 | 43.1 ± 1.25                            | 39.8 ± 1.23                            | 44.3 ± 1.2                              | 42.7 ± 2.9                              | 37.6 ± 1.58                             | 43.2 ± 3.73                           | 38.1 ± 0.77                           |
| IPF %                                  | 0.20 ± 0.03             | 0.28 ± 0.04                | 0.20 ± 0                               | 0.46 ± 0.15                            | 0.27 ± 0.02                             | 0.43 ± 0.17                             | 0.20 ± 0                                | 1.30 ± 0.97                           | 0.32 ± 0.06                           |
| PLT-I<br>10 <sup>3</sup> /uL           | 2426 ± 191              | 2245 ± 115                 | 2324 ± 163                             | 2332 ± 152                             | 2525 ± 128                              | 2074 ± 320                              | 2499 ± 187                              | 2171 ± 468                            | 2577 ± 167                            |

| <b>Hematology at 1 year</b> |                     |                        |                                |                                |                                 |                                 |                                 |                               |                               |
|-----------------------------|---------------------|------------------------|--------------------------------|--------------------------------|---------------------------------|---------------------------------|---------------------------------|-------------------------------|-------------------------------|
|                             | <b>1. Untreated</b> | <b>2. ICM. AAV9/V5</b> | <b>3. ICM. AAV9/CBh -AP4B1</b> | <b>4. ICM. AAV9/SYN -AP4B1</b> | <b>5. ICM. AAV9/pAP 4-AP4B1</b> | <b>6. ICM. AAV9/pM EP-AP4B1</b> | <b>7. ICM. AAV9/CBh -mAP4B1</b> | <b>8. IV. AAV9/Cbh -AP4B1</b> | <b>9. IV. AAV9/SYN -AP4B1</b> |
| PLT-O 10 <sup>3</sup> /uL   | 1648 ± 167          | 1462 ± 81              | 1434 ± 100                     | 1485 ± 76                      | 1582 ± 92                       | 1347 ± 201                      | 1506 ± 92                       | 1504 ± 315                    | 1803 ± 139                    |
| PLT-F 10 <sup>3</sup> /uL   | 1593 ± 135          | 1545 ± 73              | 1547 ± 101                     | 1593 ± 93                      | 1710 ± 96                       | 1442 ± 210                      | 1649 ± 96                       | 1616 ± 310                    | 1887 ± 126                    |
| PCT %                       | 1.7 ± 0.13          | 1.6 ± 0.08             | 1.7 ± 0.12                     | 1.7 ± 0.11                     | 1.8 ± 0.08                      | 1.5 ± 0.21                      | 1.8 ± 0.12                      | 1.5 ± 0.33                    | 1.8 ± 0.1                     |
| PDW fL                      | 7.4 ± 0.13          | 7.5 ± 0.05             | 7.7 ± 0.06                     | 7.6 ± 0.12                     | 7.6 ± 0.11                      | 7.4 ± 0.1                       | 7.8 ± 0.07                      | 7.4 ± 0.11                    | 7.3 ± 0.13                    |

| <b>Serum Chemistry at Day 28</b> |              |                 |                 |                 |                   |
|----------------------------------|--------------|-----------------|-----------------|-----------------|-------------------|
| <b>Vector</b>                    | <b>Route</b> | <b>ALP IU/L</b> | <b>ALT IU/L</b> | <b>AST IU/L</b> | <b>LIPASE U/L</b> |
| 1. Untreated                     | -            | 151 ± 9         | 33.3 ± 8.8      | 181 ± 129       | 260 ± 120         |
| 2. AAV9-V5 Control               | ICM          | 154 ± 10        | 34.7 ± 5.5      | 69 ± 13         | 512 ± 349         |
| 3. AAV9-CBh-hAP4B1               | ICM          | 145 ± 10        | 36.2 ± 6.1      | 76 ± 20         | 438 ± 359         |
| 4. AAV9-SYN-hAP4B1               | ICM          | 153 ± 12        | 37.3 ± 6.5      | 95 ± 26         | 122 ± 27          |
| 5. AAV9-pAP4B1-hAP4B1            | ICM          | 155 ± 11        | 24 ± 1.1        | 53 ± 9          | 123 ± 40          |
| 6. AAV9-MEP-hAP4B1               | ICM          | 147 ± 12        | 31.5 ± 3.9      | 99 ± 19         | 759 ± 427         |
| 7. AAV9-Cbh-mAP4B1               | ICM          | 154 ± 11        | 30.2 ± 4.4      | 73 ± 16         | 1441 ± 1276       |

| <b>Serum Chemistry at 1-year</b> |              |                 |                 |                 |                   |
|----------------------------------|--------------|-----------------|-----------------|-----------------|-------------------|
| <b>Vector</b>                    | <b>Route</b> | <b>ALP IU/L</b> | <b>ALT IU/L</b> | <b>AST IU/L</b> | <b>LIPASE U/L</b> |
| 1. Untreated                     | -            | 102 ± 8.1       | 39 ± 6.7        | 62 ± 6.5        | 86 ± 6.4          |
| 2. AAV9-V5 Control               | ICM          | 129 ± 15.7      | 65 ± 23.5       | 77 ± 11.1       | 93 ± 5.8          |

|                       |     |            |           |           |          |
|-----------------------|-----|------------|-----------|-----------|----------|
| 3. AAV9-CBh-hAP4B1    | ICM | 134 ± 23.6 | 43 ± 4.7  | 54 ± 3.5  | 84 ± 6.7 |
| 4. AAV9-SYN-hAP4B1    | ICM | 111 ± 16.1 | 40 ± 3.4  | 58 ± 10.2 | 81 ± 4.8 |
| 5. AAV9-pAP4B1-hAP4B1 | ICM | 144 ± 37.7 | 34 ± 1.7  | 54 ± 3.9  | 80 ± 1.9 |
| 6. AAV9-MEP-hAP4B1    | ICM | 98 ± 8.2   | 40 ± 5.7  | 55 ± 7.6  | 72 ± 4.5 |
| 7. AAV9-Cbh-mAP4B1    | ICM | 127 ± 20.8 | 46 ± 8.9  | 60 ± 4.3  | 84 ± 3.4 |
| 8. AAV9-CBh-hAP4B1    | IV  | 110 ± 15.7 | 66 ± 31.9 | 80 ± 22.1 | 73 ± 5.6 |
| 9. AAV9-SYN-hAP4B1    | IV  | 173 ± 38.5 | 37 ± 3.6  | 57 ± 4.2  | 76 ± 3.3 |

| <b>Liver Histology Day 28</b> |                     |                   |                           |                           |                            |                           |                          |
|-------------------------------|---------------------|-------------------|---------------------------|---------------------------|----------------------------|---------------------------|--------------------------|
|                               | <b>1. Untreated</b> | <b>2. ICM, V5</b> | <b>3. ICM, CBh-hAP4B1</b> | <b>4. ICM, SYN-hAP4B1</b> | <b>5. ICM, AP4B1-AP4B1</b> | <b>6. ICM, MEP-hAP4B1</b> | <b>7. ICM Cbh-mAP4B1</b> |
| <b>Inflammation</b>           |                     |                   |                           |                           |                            |                           |                          |
| None                          | 2                   | 1                 | 0                         | 3                         | 3                          | 0                         | 1                        |
| Minimal                       | 4                   | 3                 | 4                         | 3                         | 3                          | 6                         | 3                        |
| Mild                          | 0                   | 2                 | 2                         | 0                         | 0                          | 0                         | 2                        |
| Moderate                      | 0                   | 0                 | 0                         | 0                         | 0                          | 0                         | 0                        |
| Severe                        | 0                   | 0                 | 0                         | 0                         | 0                          | 0                         | 0                        |
| <b>Average</b>                | <b>0.67</b>         | <b>1.17</b>       | <b>1.33</b>               | <b>0.50</b>               | <b>0.50</b>                | <b>1.00</b>               | <b>1.17</b>              |
| <b>SEM</b>                    | <b>0.23</b>         | <b>0.34</b>       | <b>0.23</b>               | <b>0.27</b>               | <b>0.24</b>                | <b>0.00</b>               | <b>0.34</b>              |
| <b>Necrosis</b>               |                     |                   |                           |                           |                            |                           |                          |
| None                          | 3                   | 1                 | 1                         | 3                         | 3                          | 1                         | 2                        |
| Minimal                       | 3                   | 5                 | 5                         | 3                         | 3                          | 5                         | 4                        |

| <b>Liver Histology Day 28</b> |                     |                   |                           |                           |                            |                           |                          |
|-------------------------------|---------------------|-------------------|---------------------------|---------------------------|----------------------------|---------------------------|--------------------------|
|                               | <b>1. Untreated</b> | <b>2. ICM, V5</b> | <b>3. ICM, CBh-hAP4B1</b> | <b>4. ICM, SYN-hAP4B1</b> | <b>5. ICM, AP4B1-AP4B1</b> | <b>6. ICM, MEP-hAP4B1</b> | <b>7. ICM Cbh-mAP4B1</b> |
| Mild                          | 0                   | 0                 | 0                         | 0                         | 0                          | 0                         | 0                        |
| Moderate                      | 0                   | 0                 | 0                         | 0                         | 0                          | 0                         | 0                        |
| Severe                        | 0                   | 0                 | 0                         | 0                         | 0                          | 0                         | 0                        |
| <b>Average</b>                | <b>0.50</b>         | <b>0.83</b>       | <b>0.83</b>               | <b>0.50</b>               | <b>0.50</b>                | <b>0.83</b>               | <b>0.67</b>              |
| <b>SEM</b>                    | <b>0.24</b>         | <b>0.18</b>       | <b>0.18</b>               | <b>0.27</b>               | <b>0.24</b>                | <b>0.18</b>               | <b>0.23</b>              |
| <b>Fibrosis</b>               |                     |                   |                           |                           |                            |                           |                          |
| None                          | 2                   | 4                 | 0                         | 4                         | 4                          | 3                         | 3                        |
| Minimal                       | 4                   | 1                 | 6                         | 2                         | 2                          | 1                         | 2                        |
| Mild                          | 0                   | 1                 | 0                         | 0                         | 0                          | 2                         | 1                        |
| Moderate                      | 0                   | 0                 | 0                         | 0                         | 0                          | 0                         | 0                        |
| Severe                        | 0                   | 0                 | 0                         | 0                         | 0                          | 0                         | 0                        |
| <b>Average</b>                | <b>0.67</b>         | <b>0.50</b>       | <b>1.00</b>               | <b>0.33</b>               | <b>0.33</b>                | <b>0.83</b>               | <b>0.67</b>              |
| <b>SEM</b>                    | <b>0.23</b>         | <b>0.37</b>       | <b>0.00</b>               | <b>0.26</b>               | <b>0.23</b>                | <b>0.44</b>               | <b>0.37</b>              |
| <b>Steatosis</b>              |                     |                   |                           |                           |                            |                           |                          |
| <b>Average</b>                | <b>0</b>            | <b>0</b>          | <b>0</b>                  | <b>0</b>                  | <b>0</b>                   | <b>0</b>                  |                          |

| <i>Liver Histology at 1 year</i> |             |                    |                    |                     |                    |                   |                 |                  |
|----------------------------------|-------------|--------------------|--------------------|---------------------|--------------------|-------------------|-----------------|------------------|
| 1. Untreated                     | 2. ICM, V5  | 3. ICM, CBh-hAP4B1 | 4. ICM, SYN-hAP4B1 | 5. ICM, AP4B1-AP4B1 | 6. ICM, MEP-hAP4B1 | 7. ICM Cbh-mAP4B1 | 8. IVCBh-hAP4B1 | 9. IV SYN-hAP4B1 |
| <b>Inflammation</b>              |             |                    |                    |                     |                    |                   |                 |                  |
| None                             | 1           | 0                  | 2                  | 0                   | 0                  | 0                 | 0               | 0                |
| Minimal                          | 1           | 6                  | 3                  | 4                   | 5                  | 2                 | 4               | 0                |
| Mild                             | 2           | 0                  | 1                  | 1                   | 1                  | 3                 | 2               | 3                |
| Moderate                         | 2           | 0                  | 0                  | 0                   | 0                  | 1                 | 0               | 3                |
| Severe                           | 0           | 0                  | 0                  | 0                   | 0                  | 0                 | 0               | 1                |
| <b>Average</b>                   | <b>1.83</b> | <b>1.00</b>        | <b>0.83</b>        | <b>1.20</b>         | <b>1.17</b>        | <b>1.83</b>       | <b>1.33</b>     | <b>2.83</b>      |
| <b>SEM</b>                       | <b>0.52</b> | <b>0.00</b>        | <b>0.34</b>        | <b>0.22</b>         | <b>0.18</b>        | <b>0.34</b>       | <b>0.23</b>     | <b>0.31</b>      |
| <b>Necrosis</b>                  |             |                    |                    |                     |                    |                   |                 |                  |
| None                             | 0           | 0                  | 0                  | 0                   | 0                  | 0                 | 0               | 0                |
| Minimal                          | 5           | 2                  | 6                  | 2                   | 4                  | 5                 | 5               | 6                |
| Mild                             | 1           | 3                  | 0                  | 2                   | 1                  | 1                 | 0               | 1                |
| Moderate                         | 0           | 1                  | 0                  | 1                   | 1                  | 0                 | 1               | 0                |
| Severe                           | 0           | 0                  | 0                  | 0                   | 0                  | 0                 | 0               | 0                |
| <b>Average</b>                   | <b>1.17</b> | <b>1.83</b>        | <b>1.00</b>        | <b>1.80</b>         | <b>1.50</b>        | <b>1.17</b>       | <b>1.33</b>     | <b>1.00</b>      |
| <b>SEM</b>                       | <b>0.18</b> | <b>0.34</b>        | <b>0.00</b>        | <b>0.42</b>         | <b>0.37</b>        | <b>0.18</b>       | <b>0.37</b>     | <b>0.00</b>      |

| Pre-necrosis           |             |             |             |             |             |             |             |             |
|------------------------|-------------|-------------|-------------|-------------|-------------|-------------|-------------|-------------|
| None                   | 0           | 0           | 0           | 0           | 0           | 0           | 0           | 0           |
| Minimal                | 0           | 0           | 4           | 0           | 1           | 2           | 0           | 1           |
| Mild                   | 3           | 4           | 1           | 1           | 3           | 1           | 3           | 4           |
| Moderate               | 2           | 1           | 0           | 3           | 0           | 2           | 1           | 1           |
| Severe                 | 0           | 0           | 0           | 0           | 1           | 0           | 1           | 0           |
| <b>Average</b>         | <b>2.40</b> | <b>2.20</b> | <b>1.20</b> | <b>2.75</b> | <b>2.20</b> | <b>2.00</b> | <b>2.60</b> | <b>1.80</b> |
| <b>SEM</b>             | <b>0.24</b> | <b>0.20</b> | <b>0.20</b> | <b>0.25</b> | <b>0.49</b> | <b>0.45</b> | <b>0.40</b> | <b>0.18</b> |
| Steatosis and Fibrosis |             |             |             |             |             |             |             |             |
| <b>Average</b>         | <b>0</b>    | <b>0</b>    | <b>0</b>    | <b>0</b>    | <b>0</b>    | <b>0</b>    | <b>0</b>    | <b>0</b>    |

**Appendix Table S2. Tabulated summary of results of non-human primate GLP toxicology study.**

This was a GLP study of the safety of AAV9/CBh-hAP4B1 by intra-cisterna magna injection of AAV vector that was a process comparable to the intended clinical product. As well as the standard general observations, weight gain, hematology, chemistry, coagulation and histopathological examinations, there was assessment of nerve conductance velocity as an index of potential functional impairment resulting from the known/previously reported DRG inflammation caused by AAV vectors. In addition, biodistribution and immune responses were measured. The following tables summarize group averages and standard error.

**List of results**

|                                                        |    |
|--------------------------------------------------------|----|
| <i>Study cohorts: Agreed with FDA at Pre-IND stage</i> | 24 |
| Schedule of events                                     | 24 |
| <i>Weight -individual animals</i>                      | 25 |
| <i>Serum Chemistry</i>                                 | 25 |
| Complete blood count                                   | 28 |
| <i>Coagulation</i>                                     | 32 |
| <i>Nerve conductance Velocity and Amplitude</i>        | 33 |
| <i>Humoral immune response</i>                         | 33 |
| <i>Biodistribution</i>                                 | 34 |
| CNS Histopathology                                     | 35 |

| <i>Study cohorts: Agreed with FDA at Pre-IND stage</i> |                                                   |                                           |                                            |
|--------------------------------------------------------|---------------------------------------------------|-------------------------------------------|--------------------------------------------|
| <b>Group</b>                                           | <b>Treatment vehicle or test item (vg/animal)</b> | <b>Sacrifice at 1 month<br/># and sex</b> | <b>Sacrifice at 4 months<br/># and sex</b> |
| 1                                                      | Vehicle                                           | 1M, 1F                                    | 1M, 1F                                     |
| 2                                                      | 1.35 x 10 <sup>13</sup> vg                        | -                                         | 1M, 2F                                     |
| 3                                                      | 7.2 x 10 <sup>13</sup> vg                         | 2M, 1F                                    | 1M, 2F                                     |

| <i>Schedule of events</i>                 |            |          |          |          |           |           |           |            |              |               |                    |
|-------------------------------------------|------------|----------|----------|----------|-----------|-----------|-----------|------------|--------------|---------------|--------------------|
|                                           | <b>Pre</b> | <b>0</b> | <b>3</b> | <b>7</b> | <b>22</b> | <b>50</b> | <b>78</b> | <b>106</b> | <b>Daily</b> | <b>Weekly</b> | <b>Post mortem</b> |
| Vector / vehicle administration           |            | X        |          |          |           |           |           |            |              |               |                    |
| Morbidity / mortality                     |            |          |          |          |           |           |           |            | X            |               |                    |
| General exam - weight                     |            |          |          |          |           |           |           |            |              | X             |                    |
| Immune response<br>(Cellular and Humoral) | X          |          |          |          | X         | X         | X         | X          |              |               |                    |
| Nerve conductance                         | X          |          |          |          | X         | X         | X         | X          |              |               |                    |
| Serum chemistry                           | X          |          |          | X        | X         | X         |           | X          |              |               |                    |
| CBC / coagulation                         | X          |          |          | X        | X         | X         |           | X          |              |               |                    |
| Urine analysis                            | X          |          |          | X        | X         | X         |           | X          |              |               |                    |
| Histology                                 |            |          |          |          |           |           |           |            |              |               | X                  |
| Biodistribution                           |            |          |          |          |           |           |           |            |              |               | X                  |
| Gene Expression                           |            |          |          |          |           |           |           |            |              |               | X                  |



| <i>Weight - individual animals</i> |           |           |      |      |      |      |      |      |      |      |      |      |      |      |      |      |      |      |      |
|------------------------------------|-----------|-----------|------|------|------|------|------|------|------|------|------|------|------|------|------|------|------|------|------|
| Group                              | Gender    | ID        | 4    | 7    | 14   | 21   | 28   | 35   | 42   | 49   | 56   | 63   | 70   | 77   | 84   | 91   | 98   | 105  | 112  |
| Cohort 1<br>Vehicle                | M         | 220013002 | 4.25 | 4.5  | 4.8  | 4.6  | 4.55 |      |      |      |      |      |      |      |      |      |      |      |      |
|                                    | F         | 220013015 | 3.8  | 3.85 | 4.05 | 4.05 | 4    | 4.1  | 4.15 | 4.1  | 3.95 | 3.95 | 3.95 | 4    | 4    | 4.1  | 4.15 | 4.1  | 4.05 |
|                                    | F         | 220013003 | 2.95 | 3.4  | 3.5  | 3.4  | 3.45 | 3.3  | 3.35 | 3.2  | 3.3  | 3.2  | 3.2  | 3.3  | 3.4  | 3.35 | 3.35 | 3.35 | 3.3  |
|                                    | M         | 220013004 | 2.85 | 3.05 | 3.2  | 3.2  | 3.35 |      |      |      |      |      |      |      |      |      |      |      |      |
| Cohort 2<br>Low dose               | F         | 220013005 | 4.35 | 4.25 | 4.15 | 4.3  | 4.3  | 4.4  | 4.4  | 4.5  | 4.6  | 4.6  | 4.65 | 4.6  | 4.65 | 4.75 | 4.65 | 4.55 | 4.55 |
|                                    | M         | 220013006 | 3.05 | 3.05 | 3.15 | 3.1  | 3.1  | 3.1  | 3    | 3.05 | 3.05 | 3.1  | 3.1  | 3.1  | 3.1  | 3.15 | 3.15 | 3.1  | 3.1  |
|                                    | F         | 220013007 | 3.2  | 3.3  | 3.5  | 3.45 | 3.4  | 3.45 | 3.45 | 3.5  | 3.5  | 3.55 | 3.6  | 3.55 | 3.55 | 3.55 | 3.6  | 3.55 | 3.6  |
| Cohort 3<br>High dose              | M         | 220013008 | 4.9  | 4.95 | 5    | 4.9  | 5.05 |      |      |      |      |      |      |      |      |      |      |      |      |
|                                    | F         | 220013009 | 4.7  | 4.65 | 4.7  | 4.65 | 4.65 |      |      |      |      |      |      |      |      |      |      |      |      |
|                                    | M         | 220013010 | 3.95 | 3.85 | 3.9  | 3.9  | 3.95 | 3.95 | 3.9  | 3.95 | 4    | 3.95 | 4.05 | 4.05 | 3.95 | 4.05 | 3.95 | 4.1  | 4    |
|                                    | F         | 220013011 | 3.4  | 3.45 | 3.35 | 3.3  | 3.2  |      |      |      |      |      |      |      |      |      |      |      |      |
|                                    | M         | 220013012 | 3    | 3    | 3    | 3    | 3.1  | 3.3  | 3.15 | 3.05 | 3.1  | 3    | 3.25 | 3.1  | 3    | 3.1  | 3.1  | 3.05 | 3.2  |
| F                                  | 220013013 | 2.7       | 2.6  | 2.6  | 2.7  | 2.7  | 2.85 | 2.75 | 2.8  | 2.85 | 2.75 | 3    | 2.85 | 2.95 | 2.9  | 2.85 | 2.85 | 2.9  |      |

| <i>Serum Chemistry</i>       |            |             |            |            |             |
|------------------------------|------------|-------------|------------|------------|-------------|
| Cohort                       | Pre        | Day 7       | Day 22     | Day 50     | Day 106     |
| <b>ALT</b>                   |            |             |            |            |             |
| 1. PBS                       | 43.5 ± 4.1 | 40.8 ± 2.8  | 42.8 ± 5.9 | 36 ± 7     | 34 ± 11     |
| 2. AAV9/CBh-hAP4B1 low dose  | 51 ± 5.2   | 48.3 ± 2.6  | 37.7 ± 4.8 | 42.7 ± 1.7 | 40.7 ± 2.4  |
| 3. AAV9/CBh-hAP4B1 high dose | 52.2 ± 3.2 | 97.2 ± 19.4 | 41.8 ± 4.9 | 64 ± 19.6  | 57.7 ± 16.2 |
| <b>AST</b>                   |            |             |            |            |             |
| 1. PBS                       | 44 ± 4.3   | 49.3 ± 3.6  | 44.8 ± 2.7 | 42 ± 3     | 47.5 ± 0.5  |
| 2. AAV9/CBh-hAP4B1 low dose  | 37 ± 3.5   | 36.3 ± 3.4  | 44.3 ± 4.6 | 36.3 ± 3.3 | 31 ± 2.1    |
| 3. AAV9/CBh-hAP4B1 high dose | 42.7 ± 3.2 | 59.5 ± 6.5  | 51.7 ± 4.4 | 45.3 ± 5.9 | 47.7 ± 8.2  |
| <b>ALP</b>                   |            |             |            |            |             |
| 1. PBS                       | 996 ± 49   | 869 ± 72    | 930 ± 58   | 811 ± 28   | 958 ± 10    |

| <i>Serum Chemistry</i>       |             |              |               |               |                |
|------------------------------|-------------|--------------|---------------|---------------|----------------|
| <b>Cohort</b>                | <b>Pre</b>  | <b>Day 7</b> | <b>Day 22</b> | <b>Day 50</b> | <b>Day 106</b> |
| 2. AAV9/CBh-hAP4B1 low dose  | 724 ± 34    | 627 ± 42     | 707 ± 45      | 751 ± 44      | 694 ± 64       |
| 3. AAV9/CBh-hAP4B1 high dose | 686 ± 111   | 606 ± 83     | 580 ± 84      | 605 ± 75      | 659 ± 114      |
| <b>TBIL</b>                  |             |              |               |               |                |
| 1. PBS                       | 5.93 ± 1.06 | 4.23 ± 1     | 6.61 ± 1.92   | 2.97 ± 1.3    | 6.19 ± 1.85    |
| 2. AAV9/CBh-hAP4B1 low dose  | 5.68 ± 0.75 | 3.17 ± 0.34  | 2.92 ± 0.08   | 3.5 ± 0.17    | 5.17 ± 0.97    |
| 3. AAV9/CBh-hAP4B1 high dose | 3.86 ± 0.65 | 3.32 ± 0.47  | 2.96 ± 0.48   | 3.13 ± 0.55   | 3.96 ± 0.6     |
| DBIL                         |             |              |               |               |                |
| 1. PBS                       | 1.87 ± 0.26 | 2.11 ± 0.29  | 1.87 ± 0.45   | 1.59 ± 0.57   | 1.86 ± 0.44    |
| 2. AAV9/CBh-hAP4B1 low dose  | 2.1 ± 0.19  | 1.22 ± 0.07  | 1.6 ± 0.13    | 1.93 ± 0.03   | 2.02 ± 0.34    |
| 3. AAV9/CBh-hAP4B1 high dose | 1.49 ± 0.28 | 1.89 ± 0.16  | 1.71 ± 0.18   | 1.6 ± 0.14    | 1.38 ± 0.18    |
| PROT                         |             |              |               |               |                |
| 1. PBS                       | 81.3 ± 1.7  | 79.8 ± 1.3   | 81.3 ± 1.8    | 72.5 ± 2.5    | 74 ± 1         |
| 2. AAV9/CBh-hAP4B1 low dose  | 81.7 ± 0.9  | 78.3 ± 0.3   | 78.7 ± 0.7    | 79.7 ± 1.7    | 71.3 ± 0.7     |
| 3. AAV9/CBh-hAP4B1 high dose | 80.3 ± 1.4  | 77.5 ± 1.8   | 75.8 ± 2.1    | 72 ± 3.1      | 70 ± 1.2       |
| ALB                          |             |              |               |               |                |
| 1. PBS                       | 44.5 ± 0.6  | 45 ± 0.7     | 43.8 ± 0.8    | 42 ± 0        | 43.5 ± 1.5     |
| 2. AAV9/CBh-hAP4B1 low dose  | 42.7 ± 1.2  | 45.7 ± 0.7   | 43.3 ± 0.9    | 42 ± 1.5      | 42.3 ± 0.7     |
| 3. AAV9/CBh-hAP4B1 high dose | 42.5 ± 1.8  | 43.3 ± 1.8   | 41 ± 1.8      | 41.3 ± 2.6    | 39.7 ± 3.2     |
| CREA                         |             |              |               |               |                |
| 1. PBS                       | 81.5 ± 8    | 71.8 ± 7.4   | 76.3 ± 5.2    | 74 ± 13       | 83.5 ± 9.5     |
| 2. AAV9/CBh-hAP4B1 low dose  | 62 ± 10.5   | 60 ± 7.5     | 59.7 ± 5.2    | 71.3 ± 7.9    | 66.7 ± 6.5     |
| 3. AAV9/CBh-hAP4B1 high dose | 85.7 ± 7.7  | 72.5 ± 7.2   | 76 ± 8.2      | 266 ± 192.2   | 75.7 ± 7.8     |
| UREA                         |             |              |               |               |                |
| 1. PBS                       | 5.88 ± 0.15 | 5 ± 0.15     | 6.28 ± 0.14   | 4.1 ± 0.3     | 6.75 ± 0.35    |
| 2. AAV9/CBh-hAP4B1 low dose  | 5.8 ± 0.15  | 4.83 ± 0.19  | 6.27 ± 0.26   | 4.57 ± 0.17   | 5 ± 0.25       |
| 3. AAV9/CBh-hAP4B1 high dose | 6.02 ± 0.09 | 5.12 ± 0.4   | 5.98 ± 0.26   | 4.83 ± 0.57   | 4.73 ± 0.55    |
| GLU                          |             |              |               |               |                |
| 1. PBS                       | 4.16 ± 0.34 | 4.96 ± 0.25  | 4.38 ± 0.26   | 5.39 ± 0.39   | 4 ± 0.16       |
| 2. AAV9/CBh-hAP4B1 low dose  | 3.86 ± 0.14 | 4.72 ± 0.18  | 4.98 ± 0.71   | 4.69 ± 0.74   | 4.28 ± 0.35    |
| 3. AAV9/CBh-hAP4B1 high dose | 4.2 ± 0.37  | 4.46 ± 0.43  | 3.84 ± 0.13   | 4.53 ± 0.53   | 4.54 ± 0.58    |

| <i>Serum Chemistry</i>       |             |              |               |               |                |
|------------------------------|-------------|--------------|---------------|---------------|----------------|
| <b>Cohort</b>                | <b>Pre</b>  | <b>Day 7</b> | <b>Day 22</b> | <b>Day 50</b> | <b>Day 106</b> |
|                              | CK          |              |               |               |                |
| 1. PBS                       | 191 ± 28    | 162 ± 24     | 174 ± 17      | 115 ± 5       | 151 ± 3        |
| 2. AAV9/CBh-hAP4B1 low dose  | 154 ± 22    | 151 ± 21     | 164 ± 21      | 186 ± 6       | 137 ± 17       |
| 3. AAV9/CBh-hAP4B1 high dose | 229 ± 25    | 205 ± 31     | 132 ± 9       | 163 ± 18      | 152 ± 29       |
|                              | CHOL        |              |               |               |                |
| 1. PBS                       | 3.18 ± 0.28 | 2.9 ± 0.21   | 3.13 ± 0.24   | 2.75 ± 0.09   | 3.01 ± 0.12    |
| 2. AAV9/CBh-hAP4B1 low dose  | 2.86 ± 0.19 | 2.92 ± 0.17  | 3.45 ± 0.22   | 2.93 ± 0.31   | 3 ± 0.18       |
| 3. AAV9/CBh-hAP4B1 high dose | 2.66 ± 0.23 | 2.54 ± 0.16  | 2.97 ± 0.3    | 2.33 ± 0.18   | 2.56 ± 0.25    |
|                              | TRIG        |              |               |               |                |
| 1. PBS                       | 0.4 ± 0.06  | 0.46 ± 0.04  | 0.54 ± 0.09   | 0.39 ± 0.06   | 0.69 ± 0.13    |
| 2. AAV9/CBh-hAP4B1 low dose  | 0.43 ± 0.01 | 0.42 ± 0.01  | 0.33 ± 0.02   | 0.43 ± 0.03   | 0.34 ± 0.03    |
| 3. AAV9/CBh-hAP4B1 high dose | 0.43 ± 0.06 | 0.44 ± 0.05  | 0.41 ± 0.03   | 0.47 ± 0.11   | 0.48 ± 0.03    |
|                              | GLOB        |              |               |               |                |
| 1. PBS                       | 37.3 ± 1.7  | 35 ± 1       | 37.5 ± 1.6    | 31 ± 2        | 30 ± 0         |
| 2. AAV9/CBh-hAP4B1 low dose  | 38.3 ± 0.9  | 32.7 ± 0.9   | 35.3 ± 0.3    | 37 ± 0.6      | 29.3 ± 1.2     |
| 3. AAV9/CBh-hAP4B1 high dose | 38.3 ± 0.8  | 34.5 ± 1.3   | 34.8 ± 1      | 30.7 ± 2.2    | 31 ± 3.2       |
|                              |             |              |               |               |                |
|                              |             |              |               |               |                |
|                              |             |              |               |               |                |
|                              | A/G         |              |               |               |                |
| 1. PBS                       | 1.21 ± 0.05 | 1.29 ± 0.05  | 1.18 ± 0.06   | 1.36 ± 0.1    | 1.45 ± 0.05    |
| 2. AAV9/CBh-hAP4B1 low dose  | 1.12 ± 0.04 | 1.38 ± 0.07  | 1.23 ± 0.04   | 1.13 ± 0.03   | 1.47 ± 0.08    |
| 3. AAV9/CBh-hAP4B1 high dose | 1.12 ± 0.07 | 1.27 ± 0.08  | 1.19 ± 0.06   | 1.36 ± 0.13   | 1.33 ± 0.27    |
|                              | CA          |              |               |               |                |
| 1. PBS                       | 2.32 ± 0.01 | 2.22 ± 0.02  | 2.54 ± 0.03   | 2.46 ± 0.03   | 2.36 ± 0.09    |
| 2. AAV9/CBh-hAP4B1 low dose  | 2.33 ± 0.04 | 2.3 ± 0.04   | 2.65 ± 0.03   | 2.37 ± 0.03   | 2.37 ± 0.02    |
| 3. AAV9/CBh-hAP4B1 high dose | 2.33 ± 0.04 | 2.2 ± 0.03   | 2.44 ± 0.04   | 2.38 ± 0.1    | 2.23 ± 0.07    |
|                              | P           |              |               |               |                |
| 1. PBS                       | 1.67 ± 0.07 | 1.64 ± 0.14  | 1.67 ± 0.12   | 1.25 ± 0.1    | 1.52 ± 0.01    |
| 2. AAV9/CBh-hAP4B1 low dose  | 1.58 ± 0.11 | 1.52 ± 0.11  | 1.67 ± 0.11   | 1.4 ± 0.04    | 1.31 ± 0.07    |

| <b>Serum Chemistry</b>       |             |              |               |               |                |
|------------------------------|-------------|--------------|---------------|---------------|----------------|
| <b>Cohort</b>                | <b>Pre</b>  | <b>Day 7</b> | <b>Day 22</b> | <b>Day 50</b> | <b>Day 106</b> |
| 3. AAV9/CBh-hAP4B1 high dose | 1.74 ± 0.07 | 1.47 ± 0.03  | 1.51 ± 0.08   | 1.13 ± 0.09   | 0.99 ± 0.04    |
|                              | CL          |              |               |               |                |
| 1. PBS                       | 110.9 ± 0.8 | 108.7 ± 0.4  | 108.5 ± 0.6   | 109.9 ± 0.7   | 104.9 ± 1.8    |
| 2. AAV9/CBh-hAP4B1 low dose  | 110.1 ± 0.6 | 107.6 ± 0.6  | 110.5 ± 0.2   | 107.1 ± 0.5   | 106.4 ± 0.5    |
| 3. AAV9/CBh-hAP4B1 high dose | 109.6 ± 0.5 | 108.4 ± 0.5  | 110.9 ± 0.6   | 115.2 ± 0.8   | 108.3 ± 1.3    |
|                              | K           |              |               |               |                |
| 1. PBS                       | 4.13 ± 0.19 | 3.99 ± 0.19  | 3.83 ± 0.16   | 3.71 ± 0.38   | 3.76 ± 0.1     |
| 2. AAV9/CBh-hAP4B1 low dose  | 3.96 ± 0.21 | 3.74 ± 0.23  | 3.98 ± 0.07   | 3.69 ± 0.31   | 3.79 ± 0.22    |
| 3. AAV9/CBh-hAP4B1 high dose | 4.14 ± 0.22 | 3.59 ± 0.12  | 3.62 ± 0.24   | 3.66 ± 0.32   | 3.44 ± 0.18    |
|                              | NA          |              |               |               |                |
| 1. PBS                       | 148 ± 0.8   | 142 ± 0.5    | 144 ± 0.8     | 145 ± 0.5     | 149 ± 2.5      |
| 2. AAV9/CBh-hAP4B1 low dose  | 146 ± 0.3   | 145 ± 0      | 147 ± 0.6     | 144 ± 0.6     | 148 ± 1.2      |
| 3. AAV9/CBh-hAP4B1 high dose | 148 ± 1.3   | 143 ± 0.7    | 145 ± 1.2     | 149 ± 2.2     | 145 ± 1        |

| <b>Complete blood count</b>  |             |              |               |               |                |
|------------------------------|-------------|--------------|---------------|---------------|----------------|
| <b>Cohort</b>                | <b>Pre</b>  | <b>Day 7</b> | <b>Day 22</b> | <b>Day 50</b> | <b>Day 106</b> |
| <b>WBC</b>                   |             |              |               |               |                |
| 1. PBS                       | 14 ± 2.5    | 11.6 ± 1.8   | 9 ± 0.7       | 9.2 ± 1.5     | 9.9 ± 1.2      |
| 2. AAV9/CBh-hAP4B1 low dose  | 9.5 ± 1.2   | 9.8 ± 0.9    | 8.9 ± 1.1     | 8.2 ± 0.7     | 6.9 ± 1        |
| 3. AAV9/CBh-hAP4B1 high dose | 11.8 ± 2    | 8.8 ± 1      | 9.4 ± 1.3     | 8.7 ± 1.5     | 12.5 ± 0.7     |
|                              | neut        |              |               |               |                |
| 1. PBS                       | 9.9 ± 2.2   | 5.7 ± 1.5    | 3.2 ± 0.3     | 3.4 ± 1.2     | 3.4 ± 1.1      |
| 2. AAV9/CBh-hAP4B1 low dose  | 5.3 ± 1     | 4 ± 0.3      | 3 ± 0.5       | 4.1 ± 0.3     | 2.5 ± 0.4      |
| 3. AAV9/CBh-hAP4B1 high dose | 6.9 ± 1.8   | 2.7 ± 0.4    | 3.2 ± 0.4     | 3 ± 0.5       | 6.8 ± 2        |
|                              | eos         |              |               |               |                |
| 1. PBS                       | 0.13 ± 0.05 | 0.31 ± 0.12  | 0.34 ± 0.11   | 0.48 ± 0.23   | 0.5 ± 0.14     |
| 2. AAV9/CBh-hAP4B1 low dose  | 0.12 ± 0.05 | 0.17 ± 0.03  | 0.19 ± 0.02   | 0.1 ± 0.03    | 0.15 ± 0.04    |
| 3. AAV9/CBh-hAP4B1 high dose | 0.25 ± 0.09 | 0.27 ± 0.07  | 0.26 ± 0.09   | 0.24 ± 0.12   | 0.18 ± 0.09    |

| Complete blood count         |                       |               |               |               |               |
|------------------------------|-----------------------|---------------|---------------|---------------|---------------|
| Cohort                       | Pre                   | Day 7         | Day 22        | Day 50        | Day 106       |
|                              | baso                  |               |               |               |               |
| 1. PBS                       | 0.033 ± 0.009         | 0.045 ± 0.01  | 0.033 ± 0.006 | 0.035 ± 0.005 | 0.045 ± 0.015 |
| 2. AAV9/CBh-hAP4B1 low dose  | 0.03 ± 0.006          | 0.057 ± 0.015 | 0.053 ± 0.012 | 0.03 ± 0.012  | 0.027 ± 0.009 |
| 3. AAV9/CBh-hAP4B1 high dose | 0.047 ± 0.015         | 0.048 ± 0.013 | 0.057 ± 0.014 | 0.04 ± 0.01   | 0.043 ± 0.009 |
|                              | lymp                  |               |               |               |               |
| 1. PBS                       | 3.45 ± 0.81           | 4.8 ± 0.79    | 4.8 ± 0.5     | 4.65 ± 0.05   | 4.55 ± 0.65   |
| 2. AAV9/CBh-hAP4B1 low dose  | 3.53 ± 0.46           | 4.87 ± 0.58   | 5.03 ± 0.49   | 3.47 ± 0.84   | 3.7 ± 0.4     |
| 3. AAV9/CBh-hAP4B1 high dose | 4.03 ± 1.01           | 4.97 ± 0.83   | 5.22 ± 0.88   | 4.9 ± 1.62    | 4.43 ± 1.04   |
|                              | mono                  |               |               |               |               |
| 1. PBS                       | 0.39 ± 0.07           | 0.53 ± 0.11   | 0.49 ± 0.1    | 0.53 ± 0.04   | 1.14 ± 0.47   |
| 2. AAV9/CBh-hAP4B1 low dose  | 0.38 ± 0.06           | 0.55 ± 0.13   | 0.51 ± 0.14   | 0.39 ± 0.15   | 0.48 ± 0.18   |
| 3. AAV9/CBh-hAP4B1 high dose | 0.4 ± 0.05            | 0.63 ± 0.14   | 0.55 ± 0.09   | 0.43 ± 0.07   | 0.96 ± 0.33   |
|                              | luc                   |               |               |               |               |
| 1. PBS                       | 0.093 ± 0.013         | 0.135 ± 0.028 | 0.098 ± 0.014 | 0.14 ± 0.02   | 0.15 ± 0      |
| 2. AAV9/CBh-hAP4B1 low dose  | 0.087 ± 0.023         | 0.1 ± 0.015   | 0.09 ± 0.021  | 0.083 ± 0.023 | 0.067 ± 0.022 |
| 3. AAV9/CBh-hAP4B1 high dose | 0.134 ± 0.036         | 0.157 ± 0.044 | 0.157 ± 0.039 | 0.127 ± 0.052 | 0.08 ± 0.023  |
|                              | rbc                   |               |               |               |               |
| 1. PBS                       | 6.68 ± 0.33           | 6.15 ± 0.39   | 6.58 ± 0.44   | 6.8 ± 0.8     | 6.95 ± 0.85   |
| 2. AAV9/CBh-hAP4B1 low dose  | 6.3 ± 0.32            | 6.2 ± 0.31    | 6.67 ± 0.33   | 6.57 ± 0.37   | 6.2 ± 0.49    |
| 3. AAV9/CBh-hAP4B1 high dose | 6.7 ± 0.14            | 6.2 ± 0.22    | 6.62 ± 0.19   | 6.53 ± 0.32   | 6.83 ± 0.22   |
|                              | hgb                   |               |               |               | 48 ± 2        |
| 1. PBS                       | 13.9 ± 0.29           | 12.7 ± 0.39   | 14 ± 0.56     | 14.2 ± 1.05   | 41.7 ± 2.4    |
| 2. AAV9/CBh-hAP4B1 low dose  | 13 ± 0.55             | 12.9 ± 0.6    | 14 ± 0.5      | 13.8 ± 0.76   | 45.3 ± 0.9    |
| 3. AAV9/CBh-hAP4B1 high dose | 13.8 ± 0.27           | 12.7 ± 0.32   | 13.6 ± 0.26   | 13.2 ± 0.55   | 48 ± 2        |
|                              | <b>Hematocrit (%)</b> |               |               |               |               |
| 1. PBS                       | 46 ± 1.6              | 42.8 ± 1.1    | 46.3 ± 1.7    | 48.5 ± 1.5    | 48 ± 2        |
| 2. AAV9/CBh-hAP4B1 low dose  | 42 ± 1.7              | 41.7 ± 1.8    | 45.7 ± 1.8    | 44 ± 2.1      | 41.7 ± 2.4    |
| 3. AAV9/CBh-hAP4B1 high dose | 46 ± 1                | 41.7 ± 1.4    | 45 ± 1.2      | 44.7 ± 2      | 45.3 ± 0.9    |
|                              | rdw                   |               |               |               |               |

| Complete blood count         |             |             |             |             |             |
|------------------------------|-------------|-------------|-------------|-------------|-------------|
| Cohort                       | Pre         | Day 7       | Day 22      | Day 50      | Day 106     |
| 1. PBS                       | 13.2 ± 0.39 | 13.4 ± 0.32 | 14.3 ± 0.56 | 13.1 ± 0.9  | 13.5 ± 0.9  |
| 2. AAV9/CBh-hAP4B1 low dose  | 13.2 ± 0.47 | 13.5 ± 0.23 | 13.8 ± 0.44 | 12.9 ± 0.52 | 13.2 ± 0.25 |
| 3. AAV9/CBh-hAP4B1 high dose | 13.1 ± 0.25 | 13.5 ± 0.23 | 13.5 ± 0.22 | 13.2 ± 0.45 | 13.3 ± 0.55 |
|                              | mcv         |             |             |             |             |
| 1. PBS                       | 69.5 ± 3.48 | 70 ± 3.24   | 70.8 ± 3.12 | 73 ± 7      | 70 ± 6      |
| 2. AAV9/CBh-hAP4B1 low dose  | 66 ± 0.58   | 67 ± 0.58   | 68 ± 0.58   | 67.3 ± 0.67 | 67.3 ± 1.2  |
| 3. AAV9/CBh-hAP4B1 high dose | 68.2 ± 1.05 | 67.3 ± 0.88 | 68 ± 0.73   | 68 ± 1.53   | 66.7 ± 1.45 |
|                              | mch         |             |             |             |             |
| 1. PBS                       | 20.9 ± 0.67 | 20.8 ± 0.75 | 21.3 ± 0.65 | 21 ± 1.05   | 21.3 ± 1.1  |
| 2. AAV9/CBh-hAP4B1 low dose  | 20.7 ± 0.12 | 20.8 ± 0.09 | 20.9 ± 0.27 | 21.2 ± 0.27 | 21.6 ± 0.28 |
| 3. AAV9/CBh-hAP4B1 high dose | 20.6 ± 0.41 | 20.5 ± 0.44 | 20.6 ± 0.48 | 20.2 ± 0.87 | 20.4 ± 0.67 |
|                              | mchc        |             |             |             |             |
| 1. PBS                       | 30.3 ± 0.85 | 30 ± 0.82   | 30 ± 0.71   | 29 ± 1      | 31 ± 1      |
| 2. AAV9/CBh-hAP4B1 low dose  | 31 ± 0      | 31.3 ± 0.33 | 30.7 ± 0.33 | 31.7 ± 0.33 | 32 ± 0.58   |
| 3. AAV9/CBh-hAP4B1 high dose | 30.3 ± 0.49 | 30.2 ± 0.4  | 30.3 ± 0.33 | 30 ± 0.58   | 30.7 ± 0.33 |
|                              |             |             |             |             |             |
|                              |             |             |             |             |             |
|                              | thr         |             |             |             |             |
| 1. PBS                       | 272 ± 14    | 297 ± 15    | 296 ± 16    | 286 ± 7     | 268 ± 35    |
| 2. AAV9/CBh-hAP4B1 low dose  | 309 ± 51    | 347 ± 40    | 312 ± 54    | 301 ± 58    | 283 ± 69    |
| 3. AAV9/CBh-hAP4B1 high dose | 312 ± 12    | 348 ± 32    | 322 ± 32    | 312 ± 43    | 298 ± 34    |
|                              | mvp         |             |             |             |             |
| 1. PBS                       | 9.9 ± 0.36  | 9.9 ± 0.45  | 10.2 ± 0.46 | 9.7 ± 0.8   | 10.5 ± 1.2  |
| 2. AAV9/CBh-hAP4B1 low dose  | 8.9 ± 0.65  | 9.2 ± 0.87  | 9.1 ± 1.09  | 9.5 ± 0.78  | 9.3 ± 0.7   |
| 3. AAV9/CBh-hAP4B1 high dose | 9.4 ± 0.35  | 9.4 ± 0.36  | 9.8 ± 0.35  | 9.8 ± 0.83  | 9.1 ± 0.17  |
|                              | ret         |             |             |             |             |
| 1. PBS                       | 31.5 ± 3    | 71.8 ± 8.1  | 65 ± 6      | 26.5 ± 4.5  | 39 ± 10     |
| 2. AAV9/CBh-hAP4B1 low dose  | 35 ± 11.5   | 70.3 ± 21.1 | 45.3 ± 4.3  | 38.3 ± 8    | 32.3 ± 6.7  |

| Complete blood count         |            |            |            |            |            |
|------------------------------|------------|------------|------------|------------|------------|
| Cohort                       | Pre        | Day 7      | Day 22     | Day 50     | Day 106    |
| 3. AAV9/CBh-hAP4B1 high dose | 30 ± 3.7   | 54 ± 9.2   | 30.5 ± 7.8 | 40 ± 9.7   | 42 ± 9.3   |
| <b>Neutrophils (%)</b>       |            |            |            |            |            |
| 1. PBS                       | 70 ± 5.2   | 48.5 ± 6.9 | 36.3 ± 3.2 | 35.5 ± 6.5 | 34.5 ± 7.5 |
| 2. AAV9/CBh-hAP4B1 low dose  | 55 ± 5.8   | 41.3 ± 3.4 | 33.7 ± 0.9 | 52 ± 9.2   | 36.3 ± 0.9 |
| 3. AAV9/CBh-hAP4B1 high dose | 57 ± 6.5   | 31.8 ± 4.9 | 34.5 ± 3.6 | 37.7 ± 9.4 | 53 ± 12.9  |
| <b>Eosinophils (%)</b>       |            |            |            |            |            |
| 1. PBS                       | 0.5 ± 0.3  | 2.3 ± 0.8  | 4.3 ± 1.3  | 5 ± 2      | 5 ± 2      |
| 2. AAV9/CBh-hAP4B1 low dose  | 1.3 ± 0.7  | 1.7 ± 0.3  | 2.3 ± 0.3  | 1.3 ± 0.3  | 2.3 ± 0.7  |
| 3. AAV9/CBh-hAP4B1 high dose | 2.3 ± 0.6  | 2.8 ± 0.8  | 2.5 ± 0.8  | 2.3 ± 1.2  | 1.7 ± 0.9  |
| <b>Basophils (%)</b>         |            |            |            |            |            |
| 1. PBS                       | 0 ± 0      | 0.3 ± 0.3  | 0.3 ± 0.3  | 0 ± 0      | 0.5 ± 0.5  |
| 2. AAV9/CBh-hAP4B1 low dose  | 0 ± 0      | 0.7 ± 0.3  | 0.7 ± 0.3  | 0.3 ± 0.3  | 0.3 ± 0.3  |
| 3. AAV9/CBh-hAP4B1 high dose | 0.2 ± 0.2  | 0.7 ± 0.2  | 0.8 ± 0.2  | 0.3 ± 0.3  | 0.3 ± 0.3  |
| <b>Lymphocytes (%)</b>       |            |            |            |            |            |
| 1. PBS                       | 25.5 ± 4.7 | 43 ± 6.6   | 52.8 ± 1.4 | 52 ± 8     | 46.5 ± 0.5 |
| 2. AAV9/CBh-hAP4B1 low dose  | 38.7 ± 5.8 | 49.7 ± 1.9 | 57 ± 1.5   | 41.3 ± 7.3 | 53.7 ± 2   |
| 3. AAV9/CBh-hAP4B1 high dose | 35.8 ± 5.7 | 56.3 ± 4.6 | 54.8 ± 3.4 | 53.7 ± 8.2 | 36.3 ± 9.2 |
|                              |            |            |            |            |            |
|                              |            |            |            |            |            |
| <b>Monocytes (%)</b>         |            |            |            |            |            |
| 1. PBS                       | 2.8 ± 0.3  | 4.5 ± 0.5  | 5.5 ± 1.2  | 3.5 ± 2.5  | 12.5 ± 6.5 |
| 2. AAV9/CBh-hAP4B1 low dose  | 4 ± 0      | 5.7 ± 0.9  | 5.7 ± 0.9  | 4.7 ± 1.5  | 6.7 ± 1.8  |
| 3. AAV9/CBh-hAP4B1 high dose | 3.5 ± 0.4  | 6.7 ± 1.2  | 5.8 ± 0.6  | 5 ± 0      | 8 ± 3.1    |
| <b>Leucocytes (%)</b>        |            |            |            |            |            |
| 1. PBS                       | 1 ± 0      | 1 ± 0      | 1.3 ± 0.3  | 1 ± 1      | 1.5 ± 0.5  |
| 2. AAV9/CBh-hAP4B1 low dose  | 1 ± 0      | 1 ± 0      | 1 ± 0      | 1 ± 0      | 1.3 ± 0.3  |
| 3. AAV9/CBh-hAP4B1 high dose | 1.2 ± 0.3  | 1.5 ± 0.3  | 1.5 ± 0.2  | 1.3 ± 0.3  | 0.7 ± 0.3  |

| Complete blood count         |           |           |           |           |           |
|------------------------------|-----------|-----------|-----------|-----------|-----------|
| Cohort                       | Pre       | Day 7     | Day 22    | Day 50    | Day 106   |
| <b>Reticulocytes (%)</b>     |           |           |           |           |           |
| 1. PBS                       | 0.5 ± 0.3 | 1.3 ± 0.3 | 1 ± 0     | 0 ± 0     | 0.5 ± 0.5 |
| 2. AAV9/CBh-hAP4B1 low dose  | 0.3 ± 0.3 | 1.3 ± 0.3 | 1 ± 0     | 0.3 ± 0.3 | 0.3 ± 0.3 |
| 3. AAV9/CBh-hAP4B1 high dose | 0.5 ± 0.2 | 0.8 ± 0.2 | 0.3 ± 0.2 | 0.7 ± 0.3 | 0.7 ± 0.3 |

| Coagulation                  |             |             |             |             |             |
|------------------------------|-------------|-------------|-------------|-------------|-------------|
| Cohort                       | Pre         | Day 7       | Day 22      | Day 50      | Day 106     |
| <b>aPTT (sec)</b>            |             |             |             |             |             |
| 1. PBS                       | 24.9 ± 1.1  | 24.3 ± 0.4  | 24.5 ± 0.6  | 23.2 ± 0.2  | 24.9 ± 0.8  |
| 2. AAV9/CBh-hAP4B1 low dose  | 24.5 ± 0.2  | 24.9 ± 0    | 24.9 ± 0.5  | 25.2 ± 1    | 26.1 ± 0.3  |
| 3. AAV9/CBh-hAP4B1 high dose | 26.7 ± 1.1  | 27.4 ± 0.8  | 27.1 ± 1.1  | 26 ± 0.4    | 26.9 ± 0.9  |
| <b>PT (sec)</b>              |             |             |             |             |             |
| 1. PBS                       | 12.6 ± 0.3  | 12.7 ± 0.5  | 13.4 ± 0.4  | 13.2 ± 0.6  | 13.7 ± 0.3  |
| 2. AAV9/CBh-hAP4B1 low dose  | 12.6 ± 0.4  | 12.3 ± 0.4  | 12.7 ± 0.3  | 13 ± 0.3    | 13.2 ± 0.5  |
| 3. AAV9/CBh-hAP4B1 high dose | 12.4 ± 0.2  | 12.6 ± 0.3  | 12.6 ± 0.5  | 12.8 ± 0.6  | 12.8 ± 0.3  |
| <b>Fibrinogen (g/L)</b>      |             |             |             |             |             |
| 1. PBS                       | 2.2 ± 0.21  | 1.92 ± 0.08 | 1.72 ± 0.16 | 1.57 ± 0.18 | 1.67 ± 0.11 |
| 2. AAV9/CBh-hAP4B1 low dose  | 2.26 ± 0.26 | 2.08 ± 0.16 | 1.94 ± 0.12 | 2.19 ± 0.19 | 2.07 ± 0.18 |
| 3. AAV9/CBh-hAP4B1 high dose | 2.31 ± 0.14 | 2.38 ± 0.16 | 2.18 ± 0.13 | 1.73 ± 0.19 | 1.97 ± 0.02 |
|                              |             |             |             |             |             |
|                              |             |             |             |             |             |



| <i>Nerve conduction Velocity and Amplitude</i>                                    |            |            |            |            |            |
|-----------------------------------------------------------------------------------|------------|------------|------------|------------|------------|
| Cohort                                                                            | Pre        | Day 22     | Day 50     | Day 78     | Day 106    |
| <b>Nerve conduction velocity - Sciatic</b>                                        |            |            |            |            |            |
| 1. PBS                                                                            | 36.3 ± 1   | 36.5 ± 1.6 | 35.6       | 35.2       | 37.9       |
| 2. AAV9/CBh-hAP4B1 low dose                                                       | 35.3 ± 1.1 | 31.8 ± 2.1 | 36.9 ± 2.4 | 34.1 ± 1.3 | 35.2 ± 1   |
| 3. AAV9/CBh-hAP4B1 high dose                                                      | 38.7 ± 1.3 | 35.9 ± 1.2 | 36.4 ± 0.5 | 37.8 ± 1.3 | 38.5 ± 1.2 |
| <b>Nerve conduction amplitude - Sciatic</b>                                       |            |            |            |            |            |
| 1. PBS                                                                            | 44.2 ± 2.5 | 44.3 ± 0.8 | 48.6       | 48.2       | 48.6       |
| 2. AAV9/CBh-hAP4B1 low dose                                                       | 45.2 ± 6.6 | 48.6 ± 7.3 | 49.1 ± 0.5 | 48.6 ± 0.5 | 44.4 ± 4.4 |
| 3. AAV9/CBh-hAP4B1 high dose                                                      | 38 ± 4.6   | 46.6 ± 1.5 | 51.3 ± 2.6 | 48.4 ± 0.1 | 40.8 ± 8.1 |
| <b>Nerve conduction velocity - Median</b>                                         |            |            |            |            |            |
| 1. PBS                                                                            | 15.3 ± 0.8 | 14.9 ± 0.6 | 17.1       | 16.4       | 17.5       |
| 2. AAV9/CBh-hAP4B1 low dose                                                       | 16.3 ± 0.4 | 14.5 ± 0.3 | 16.5 ± 0.4 | 17.5 ± 0.3 | 17.3 ± 0.2 |
| 3. AAV9/CBh-hAP4B1 high dose                                                      | 17.8 ± 0.8 | 14.8 ± 0.2 | 17.6 ± 0.5 | 17 ± 0.4   | 16.6 ± 1.1 |
| <b>Nerve conduction amplitude - Median</b>                                        |            |            |            |            |            |
| 1. PBS                                                                            | 23.6 ± 1.5 | 23.4 ± 2.9 | 27.5       | 24.8       | 27.1       |
| 2. AAV9/CBh-hAP4B1 low dose                                                       | 18.3 ± 1   | 19.8 ± 0.7 | 24.2 ± 0.1 | 24.3 ± 0.1 | 24.6 ± 0.2 |
| 3. AAV9/CBh-hAP4B1 high dose                                                      | 22.5 ± 2.1 | 24.6 ± 2.3 | 24.4 ± 0.1 | 32.5 ± 7.8 | 40.5 ± 8.2 |
| <sup>1</sup> Entries with no standard error represent cohorts with only 2 animals |            |            |            |            |            |

| <i>Humoral immune response</i> |        |           |                |       |        |        |
|--------------------------------|--------|-----------|----------------|-------|--------|--------|
| Group                          | Gender | ID        | Antibody titer |       |        |        |
|                                |        |           | Pre            | Day 7 | Day 29 | Day113 |
| Cohort 1<br>Vehicle            | M      | 220013002 | 766            | 650   | 500    | n.d.   |
|                                | F      | 220013015 | -ve            | -ve   | -ve    | n.d    |
|                                | F      | 220013003 | 141            | 86    | 98     | 86     |
|                                | M      | 220013004 | 193            | 195   | 194    | 194    |
| Cohort 2 Low dose              | F      | 220013005 | 180            | >6250 | 5131   | >6250  |

|                       |   |           |     |       |       |       |
|-----------------------|---|-----------|-----|-------|-------|-------|
|                       | M | 220013006 | 154 | 5603  | 5465  | >6250 |
|                       | F | 220013007 | 45  | 5464  | 1151  | 2513  |
| Cohort 3<br>High dose | M | 220013008 | 169 | >6250 | >6250 | n.d.  |
|                       | F | 220013009 | -ve | 3540  | 5858  | n.d.  |
|                       | M | 220013010 | 91  | >6250 | >6250 | n.d.  |
|                       | F | 220013011 | -v1 | 4701  | 5429  | >6250 |
|                       | M | 220013012 | 10  | >6250 | >6250 | >6250 |
|                       | F | 220013013 | -ve | >6250 | >6250 | >6250 |

| <i>Biodistribution</i> |                           |                           |                            |
|------------------------|---------------------------|---------------------------|----------------------------|
| <b>Organ</b>           | <b>high dose 4 months</b> | <b>low dose</b>           | <b>high dose, 1 month</b>  |
| Cortex                 | $6.8 \pm 2.0 \times 10^5$ | $6.6 \pm 3.5 \times 10^4$ | $5.4 \pm 4.0 \times 10^5$  |
| Cerebellum             | $8.8 \pm 4.9 \times 10^5$ | $3.2 \pm 2.1 \times 10^4$ | $4.1 \pm 2.0 \times 10^5$  |
| Thalamus               | $1.7 \pm 0.9 \times 10^6$ | $1.1 \pm 0.3 \times 10^5$ | $1.9 \pm 0.3 \times 10^5$  |
| Cervical spinal cord   | $1.1 \pm 0.6 \times 10^6$ | $3.9 \pm 1.8 \times 10^5$ | $7.1 \pm 2.5 \times 10^5$  |
| Thoracic spinal cord   | $1.5 \pm 0.5 \times 10^6$ | $3.2 \pm 1.7 \times 10^5$ | $1.1 \pm 0.3 \times 10^6$  |
| Lumbar spinal cord     | $1.6 \pm 0.5 \times 10^6$ | $2.5 \pm 1.7 \times 10^5$ | $1.6 \pm 0.05 \times 10^6$ |
| Cervical DRG           | $1.2 \pm 0.2 \times 10^6$ | $1.9 \pm 1.3 \times 10^5$ | $2.2 \pm 0.3 \times 10^6$  |
| Thoracic DRG           | $2.0 \pm 5.2 \times 10^5$ | $1.3 \pm 1.0 \times 10^5$ | $1.2 \pm 0.5 \times 10^6$  |
| Lumbar DRG             | $8.6 \pm 3.5 \times 10^5$ | $1.5 \pm 1.1 \times 10^5$ | $8.5 \pm 6.9 \times 10^5$  |
| Sciatic Nerve          | $5.1 \pm 2.0 \times 10^3$ | $2.84 \times 10^2$        | $2.5 \pm 1.4 \times 10^3$  |
|                        |                           |                           |                            |
| Liver                  | $8.5 \pm 1.7 \times 10^6$ | $8.1 \times 10^1$         | $2.9 \pm 2.5 \times 10^6$  |
| Spleen                 | $2.3 \pm 0.7 \times 10^5$ | $5.6 \pm 3.8 \times 10^4$ | $3.4 \pm 4.3 \times 10^6$  |
| Kidney                 | $3.6 \pm 0.5 \times 10^4$ | $3.0 \times 10^2$         | $1.4 \pm 0.6 \times 10^4$  |
| Lung                   | $9.0 \pm 1.9 \times 10^4$ | nd                        | $2.2 \pm 1.8 \times 10^4$  |
| Ileum                  | $1.1 \pm 0.6 \times 10^4$ | $3.9 \times 10^3$         | $2.6 \pm 2.4 \times 10^3$  |
| Skeletal muscle        | $3.8 \pm 0.3 \times 10^4$ | nd                        | $4.4 \pm 4.2 \times 10^3$  |
| Heart                  | $6.4 \pm 1.5 \times 10^3$ | nd                        | $2.3 \pm 2.3 \times 10^4$  |
| Testes                 | $2.0 \times 10^3$         | nd                        | $4.4 \times 10^2$          |
| Ovary                  | $5.0 \times 10^3$         | nd                        | $1.8 \times 10^4$          |

| <b>CNS histopathology</b>                                             |                                             |                                                                      |             |                                                                                    |             |                                                                                               |             |
|-----------------------------------------------------------------------|---------------------------------------------|----------------------------------------------------------------------|-------------|------------------------------------------------------------------------------------|-------------|-----------------------------------------------------------------------------------------------|-------------|
| <i>Histopathology scores – none, minimal, mild, moderate, severe.</i> |                                             |                                                                      |             |                                                                                    |             |                                                                                               |             |
| <b>Organ</b>                                                          | <b>Pathology</b>                            | <b>Incidence in cohort 1<br/>(Vehicle, n=2 at 4wk; n=2 at 16wk))</b> |             | <b>Incidence in cohort 2:<br/>Low does AAV9-CBh-<br/>hAP4B1.<br/>(n=3 at 16wk)</b> |             | <b>Incidence in cohort 3:<br/>High dose AAV9-CBh-<br/>hAP4B1<br/>(n=3 at 4; n=3 at 16wk)_</b> |             |
|                                                                       |                                             | <b>Minimal</b>                                                       | <b>Mild</b> | <b>Minimal</b>                                                                     | <b>Mild</b> | <b>Minimal</b>                                                                                | <b>Mild</b> |
| DRG                                                                   | Neuron degeneration/necrosis                | -                                                                    | -           | -                                                                                  | -           | 1                                                                                             | 1           |
|                                                                       | Satellite glial cell, increased cellularity | -                                                                    | -           | -                                                                                  | -           | 4                                                                                             | 1           |
|                                                                       | Mononuclear infiltrate,                     | -                                                                    | -           | -                                                                                  | -           | 2                                                                                             | 1           |
|                                                                       | Neuron vacuolation                          | -                                                                    | 2           | 2                                                                                  | -           | 2                                                                                             | 1           |
| Spinal cord                                                           | Astrocytosis                                | -                                                                    | -           | 3                                                                                  | -           | 2                                                                                             | 2           |
|                                                                       | Nerve fiber degeneration                    | -                                                                    | -           | 1                                                                                  | 2           | 1                                                                                             | 6           |
|                                                                       | Mononuclear cell infiltrate                 | -                                                                    | -           | -                                                                                  | -           | 1                                                                                             | -           |
|                                                                       | Neuronophagia                               | -                                                                    | -           | -                                                                                  | -           | 1                                                                                             | -           |
| Brain                                                                 | Astrocytosis                                | -                                                                    | -           | -                                                                                  | -           | 1                                                                                             |             |
|                                                                       | Decreased cellularity, neuron               | -                                                                    | -           |                                                                                    |             |                                                                                               | 1           |
|                                                                       | Mononuclear cell infiltrate1                | -                                                                    | -           | 1                                                                                  | -           | 3                                                                                             |             |
| Sciatic Nerve                                                         | Neuron degeneration                         | -                                                                    | -           | 1                                                                                  | -           | 1                                                                                             | -           |
| 1. Locations included perivascular, meninges, choroid plexus          |                                             |                                                                      |             |                                                                                    |             |                                                                                               |             |

**Appendix Table S3: Estimate dose for human trials based on cerebrospinal fluid (CSF) volume.**

| Organism                                                          | Route | Total dose (genome copies)                 | CSF volume (ml) <sup>1</sup> | Vector genomes (vg)/ml    |
|-------------------------------------------------------------------|-------|--------------------------------------------|------------------------------|---------------------------|
| Neonatal mice <sup>2</sup><br>Study # ZLY-02                      | ICM   | $1 \times 10^{11}$                         | 0.002                        | $5 \times 10^{13}$        |
| Adult mouse dosing study<br>Study # JPW-01                        | ICM   | $0.4 \times 10^{11}$ to $2 \times 10^{11}$ | 0.04                         | $1$ to $5 \times 10^{12}$ |
| Mouse long term toxicology<br>Study # JAX-131579                  | ICM   | $7.5 \times 10^{10}$                       | 0.04                         | $1.9 \times 10^{12}$      |
| GLP NHP toxicology <sup>3</sup><br>Study # ERBC -<br>20220013TCYP | ICM   | High dose: $7.2 \times 10^{13}$            | 12                           | $6 \times 10^{12}$        |
|                                                                   |       | Low dose: $1.4 \times 10^{13}$             | 12                           | $1.2 \times 10^{12}$      |
| Planned human trial dose <sup>4</sup>                             | ICM   | $4.0 \times 10^{14}$                       | 75                           | $5.3 \times 10^{12}$      |

1. Volumes from Chen et al. 2023. PMID: 36606687
2. Neonatal mice – assume CSF volume scales with body weight. Note injection volume was 5ul to vector may have spread beyond the intended injection site
3. Primates were an average of 4.3kg - smaller than typical so we propose to reduce Chen’s 15ml estimate
4. Assuming 4–5-year-old patients. Please note that inclusion criteria will include 1–5-year-old patients

**Appendix table S4: Exact P values for statistics**

| Figure 1 E                  | Symbol     | P Value |             |         |          |         |        |         |        |         |  |  |
|-----------------------------|------------|---------|-------------|---------|----------|---------|--------|---------|--------|---------|--|--|
| WT vs. Untreated            | ****       | <0.0001 |             |         |          |         |        |         |        |         |  |  |
| WT vs. V5_empty             | ****       | <0.0001 |             |         |          |         |        |         |        |         |  |  |
| WT vs. 2E5 vg/cell          | ****       | <0.0001 |             |         |          |         |        |         |        |         |  |  |
| WT vs. 4E5 vg/cell          | **         | 0.0026  |             |         |          |         |        |         |        |         |  |  |
| Untreated vs. V5_empty      | ns         | >0.9999 |             |         |          |         |        |         |        |         |  |  |
| Untreated vs. 2E5 vg/cell   | ns         | 0.7241  |             |         |          |         |        |         |        |         |  |  |
| Untreated vs. 4E5 vg/cell   | *          | 0.0161  |             |         |          |         |        |         |        |         |  |  |
| V5_empty vs. 2E5 vg/cell    | ns         | 0.6545  |             |         |          |         |        |         |        |         |  |  |
| V5_empty vs. 4E5 vg/cell    | *          | 0.0133  |             |         |          |         |        |         |        |         |  |  |
| 2E5 vg/cell vs. 4E5 vg/cell | ns         | 0.1112  |             |         |          |         |        |         |        |         |  |  |
|                             | CEREBELLUM |         | SPINAL CORD |         | CEREBRUM |         | LIVER  |         | HEART  |         |  |  |
| Figure 3 B-F                | Symbol     | P Value | Symbol      | P Value | Symbol   | P Value | Symbol | P Value | Symbol | P Value |  |  |

|                                       |     |         |    |         |    |         |    |         |      |         |  |  |
|---------------------------------------|-----|---------|----|---------|----|---------|----|---------|------|---------|--|--|
| Wildtype vs. KO Untreated             | ns  | >0.9999 | ns | >0.9999 | ns | >0.9999 | ns | >0.9999 | ns   | >0.9999 |  |  |
| Wildtype vs. KO V5-empty ICM          | ns  | >0.9999 | ns | >0.9999 | ns | >0.9999 | ns | >0.9999 | ns   | 0.8364  |  |  |
| Wildtype vs. KO Cbh-hAP4B1 ICM        | *** | 0.0001  | *  | 0.0167  | *  | 0.0297  | ns | 0.2450  | **** | <0.0001 |  |  |
| Wildtype vs. KO V5-empty IV           | ns  | >0.9999 | ns | >0.9999 | ns | >0.9999 | ns | >0.9999 | ns   | 0.9770  |  |  |
| Wildtype vs. KO Cbh-hAP4B1 IV         | ns  | >0.9999 | ns | >0.9999 | ns | >0.9999 | ns | 0.7481  | **** | <0.0001 |  |  |
| KO Untreated vs. KO V5-empty ICM      | ns  | >0.9999 | ns | >0.9999 | ns | >0.9999 | ns | >0.9999 | ns   | 0.8718  |  |  |
| KO Untreated vs. KO Cbh-hAP4B1 ICM    | *** | 0.0001  | *  | 0.0167  | *  | 0.0298  | ns | 0.2479  | **** | <0.0001 |  |  |
| KO Untreated vs. KO V5-empty IV       | ns  | >0.9999 | ns | >0.9999 | ns | >0.9999 | ns | >0.9999 | ns   | 0.9865  |  |  |
| KO Untreated vs. KO Cbh-hAP4B1 IV     | ns  | >0.9999 | ns | >0.9999 | ns | >0.9999 | ns | 0.7524  | **** | <0.0001 |  |  |
| KO V5-empty ICM vs. KO Cbh-hAP4B1 ICM | *** | 0.0001  | *  | 0.0171  | *  | 0.0298  | ns | 0.2463  | **** | <0.0001 |  |  |
| KO V5-empty ICM vs. KO V5-empty IV    | ns  | >0.9999 | ns | >0.9999 | ns | >0.9999 | ns | >0.9999 | ns   | 0.9963  |  |  |

|                                               |                     |               |                     |               |                     |               |              |               |           |               |  |  |
|-----------------------------------------------|---------------------|---------------|---------------------|---------------|---------------------|---------------|--------------|---------------|-----------|---------------|--|--|
| KO V5-empty ICM vs. KO Cbh-hAP4B1 IV          | ns                  | >0.9999       | ns                  | >0.9999       | ns                  | >0.9999       | ns           | 0.7500        | ****      | <0.0001       |  |  |
| KO Cbh-hAP4B1 ICM vs. KO V5-empty IV          | ***                 | 0.0001        | *                   | 0.0167        | *                   | 0.0297        | ns           | 0.2434        | ****      | <0.0001       |  |  |
| <b>KO Cbh-hAP4B1 ICM vs. KO Cbh-hAP4B1 IV</b> | <b>***</b>          | <b>0.0001</b> | <b>*</b>            | <b>0.0206</b> | <b>*</b>            | <b>0.0312</b> | <b>ns</b>    | <b>0.9107</b> | <b>ns</b> | <b>0.9953</b> |  |  |
| KO V5-empty IV vs. KO Cbh-hAP4B1 IV           | ns                  | >0.9999       | ns                  | >0.9999       | ns                  | >0.9999       | ns           | 0.7455        | ****      | <0.0001       |  |  |
|                                               | CEREBRUM            |               | SPINAL CORD         |               | CEREBELLUM          |               |              |               |           |               |  |  |
| FIGURE 3 H,J,L                                | Symbol              | P Value       | Symbol              | P Value       | Symbol              | P Value       |              |               |           |               |  |  |
| Hom V5-AP4B1 ICM vs. Hom V5 only ICM          | *                   | 0.0111        | **                  | 0.0049        | *                   | 0.0207        |              |               |           |               |  |  |
|                                               | CLASPING SCORE 3MPT |               | CLASPING SCORE 6MPT |               | CLASPING SCORE 9MPT |               | ROTAROD 6MPT |               |           |               |  |  |
| FIGURE 4                                      | Symbol              | P Value       | Symbol              | P Value       | Symbol              | P Value       | Symbol       | P Value       |           |               |  |  |
| WT vs. KO untreated                           | ns                  | 0.2372        | ****                | <0.0001       | ****                | <0.0001       | *            | 0.0150        |           |               |  |  |
| WT vs. KO V5-empty                            | ns                  | 0.0780        | ***                 | 0.0001        | ****                | <0.0001       | *            | 0.0115        |           |               |  |  |

|                                 |                                |         |                             |         |                 |         |              |         |  |  |  |  |
|---------------------------------|--------------------------------|---------|-----------------------------|---------|-----------------|---------|--------------|---------|--|--|--|--|
| WT vs. KO Cbh-hAP4B1            | ns                             | 0.8299  | ns                          | 0.3203  | ns              | 0.2636  | ns           | 0.9658  |  |  |  |  |
| WT vs. KO SYN-hAP4B1            | ns                             | 0.6764  | ns                          | 0.4941  | ns              | 0.1793  | ns           | 0.5899  |  |  |  |  |
| KO untreated vs. KO V5-empty    | ns                             | 0.9499  | ns                          | 0.9999  | ns              | 0.9898  | ns           | 0.9959  |  |  |  |  |
| KO untreated vs. KO Cbh-hAP4B1  | ns                             | 0.8299  | *                           | 0.0201  | *               | 0.0291  | ns           | 0.0756  |  |  |  |  |
| KO untreated vs. KO SYN-hAP4B1  | ns                             | 0.9739  | *                           | 0.0272  | ns              | 0.1263  | ns           | 0.5188  |  |  |  |  |
| KO V5-empty vs. KO Cbh-hAP4B1   | ns                             | 0.4514  | *                           | 0.0272  | *               | 0.0165  | ns           | 0.0533  |  |  |  |  |
| KO V5-empty vs. KO SYN-hAP4B1   | ns                             | 0.7325  | *                           | 0.0335  | ns              | 0.0711  | ns           | 0.3807  |  |  |  |  |
| KO Cbh-hAP4B1 vs. KO SYN-hAP4B1 | ns                             | 0.9962  | ns                          | 0.9999  | ns              | 0.9954  | ns           | 0.9067  |  |  |  |  |
|                                 | CORPUS CALLOSUM THICKNESS (5A) |         | LATERAL VENTRICLE SIZE (5B) |         | PLASMA NFL (5D) |         | CSF NFL (5D) |         |  |  |  |  |
| FIGURE 5                        | Symbol                         | P Value | Symbol                      | P Value | Symbol          | P Value | Symbol       | P Value |  |  |  |  |



|                                 |      |            |             |         |          |           |       |        |  |  |  |  |
|---------------------------------|------|------------|-------------|---------|----------|-----------|-------|--------|--|--|--|--|
| WT vs. KO untreated             | /    | /          | /           | /       | ****     | <0.0001   | ns    | 0.3788 |  |  |  |  |
| Wildtype vs. KO V5-empty        | **** | <0.0001    | ****        | <0.0001 | ****     | <0.0001   | ns    | 0.4873 |  |  |  |  |
| Wildtype vs. KO CBh-hAP4B1      | ns   | 0.2149     | ns          | 0.2719  | ns       | >0.9999   | ns    | 0.9993 |  |  |  |  |
| Wildtype vs. KO SYN-hAP4B1      | ns   | 0.1947     | ns          | 0.8654  | ns       | >0.9999   | ns    | 0.9800 |  |  |  |  |
| KO untreated vs. KO V5-empty    | /    | /          | /           | /       | ns       | 0.2602    | ns    | 0.9996 |  |  |  |  |
| KO untreated vs. KO CBh-hAP4B1  | /    | /          | /           | /       | ****     | <0.0001   | ns    | 0.2834 |  |  |  |  |
| KO untreated vs. KO SYN-hAP4B1  | /    | /          | /           | /       | ****     | <0.0001   | ns    | 0.6615 |  |  |  |  |
| KO V5-empty vs. KO CBh-hAP4B1   | ***  | 0.0001     | **          | 0.0013  | ****     | <0.0001   | ns    | 0.3756 |  |  |  |  |
| KO V5-empty vs. KO SYN-hAP4B1   | ***  | 0.0001     | ****        | <0.0001 | ****     | <0.0001   | ns    | 0.7767 |  |  |  |  |
| KO CBh-hAP4B1 vs. KO SYN-hAP4B1 | ns   | >0.9999    | ns          | 0.7253  | ns       | >0.9999   | ns    | 0.9316 |  |  |  |  |
|                                 |      | CEREBELLUM | SPINAL CORD |         | CEREBRUM | BRAINSTEM | LIVER | HEART  |  |  |  |  |

| FIGURE 5E                       | Symbol | P Value | Symbol | P Value | Symbol | P Value | Symbol | P Value | Symbol | P Value | Symbol | P Value |
|---------------------------------|--------|---------|--------|---------|--------|---------|--------|---------|--------|---------|--------|---------|
| Wildtype vs. KO Untreated       | ns     | >0.9999 | ns     | >0.9999 | ns     | >0.9999 | ns     | >0.9999 | ns     | >0.9999 | ns     | >0.9999 |
| Wildtype vs. KO V5-empty        | ns     | >0.9999 | ns     | >0.9999 | ns     | >0.9999 | ns     | >0.9999 | ns     | >0.9999 | ns     | >0.9999 |
| Wildtype vs. KO CBh-hAP4B1      | ns     | 0.3866  | ns     | 0.9976  | **     | 0.0013  | ns     | 0.9389  | ns     | 0.9314  | ns     | 0.7522  |
| Wildtype vs. KO SYN-hAP4B1      | ns     | 0.4583  | ns     | 0.9996  | ns     | 0.8263  | ****   | <0.0001 | ns     | 0.7751  | ns     | 0.9476  |
| KO Untreated vs. KO V5-empty    | ns     | >0.9999 | ns     | >0.9999 | ns     | >0.9999 | ns     | >0.9999 | ns     | >0.9999 | ns     | >0.9999 |
| KO Untreated vs. KO CBh-hAP4B1  | ns     | 0.3855  | ns     | 0.9976  | **     | 0.0013  | ns     | 0.9357  | ns     | 0.9314  | ns     | 0.7484  |
| KO Untreated vs. KO SYN-hAP4B1  | ns     | 0.4571  | ns     | 0.9996  | ns     | 0.8252  | ****   | <0.0001 | ns     | 0.7752  | ns     | 0.9459  |
| KO V5-empty vs. KO CBh-hAP4B1   | ns     | 0.3901  | ns     | 0.9979  | **     | 0.0013  | ns     | 0.9390  | ns     | 0.9316  | ns     | 0.7528  |
| KO V5-empty vs. KO SYN-hAP4B1   | ns     | 0.4620  | ns     | 0.9997  | ns     | 0.8257  | ****   | <0.0001 | ns     | 0.7754  | ns     | 0.9478  |
| KO CBh-hAP4B1 vs. KO SYN-hAP4B1 | ns     | >0.9999 | ns     | >0.9999 | *      | 0.0360  | **     | 0.0016  | ns     | 0.9962  | ns     | 0.9904  |

| FIGURE 5F                      | CEREBELLUM |         | SPINAL CORD |         | CEREBRUM |         | BRAINSTEM |         | LIVER  |         | HEART  |         |
|--------------------------------|------------|---------|-------------|---------|----------|---------|-----------|---------|--------|---------|--------|---------|
|                                | Symbol     | P Value | Symbol      | P Value | Symbol   | P Value | Symbol    | P Value | Symbol | P Value | Symbol | P Value |
| Wildtype vs. KO Untreated      | ns         | >0.9999 | ns          | >0.9999 | ns       | >0.9999 | ns        | >0.9999 | ns     | >0.9999 | ns     | >0.9999 |
| Wildtype vs. KO V5-empty       | ns         | >0.9999 | ns          | >0.9999 | ns       | >0.9999 | ns        | >0.9999 | ns     | >0.9999 | ns     | >0.9999 |
| Wildtype vs. KO CBh-hAP4B1     | ns         | 0.7397  | ns          | 0.9943  | *        | 0.0167  | ns        | 0.6316  | ns     | >0.9999 | ns     | 0.9996  |
| Wildtype vs. KO SYN-hAP4B1     | ns         | 0.1703  | ns          | >0.9999 | ns       | >0.9999 | ns        | 0.0991  | ns     | >0.9999 | ns     | >0.9999 |
| KO Untreated vs. KO V5-empty   | ns         | >0.9999 | ns          | >0.9999 | ns       | >0.9999 | ns        | >0.9999 | ns     | >0.9999 | ns     | >0.9999 |
| KO Untreated vs. KO CBh-hAP4B1 | ns         | 0.7397  | ns          | 0.9943  | *        | 0.0167  | ns        | 0.6316  | ns     | >0.9999 | ns     | 0.9996  |
| KO Untreated vs. KO SYN-hAP4B1 | ns         | 0.1703  | ns          | >0.9999 | ns       | >0.9999 | ns        | 0.0991  | ns     | >0.9999 | ns     | >0.9999 |
| KO V5-empty vs. KO CBh-hAP4B1  | ns         | 0.7400  | ns          | 0.9943  | *        | 0.0167  | ns        | 0.6316  | ns     | >0.9999 | ns     | 0.9996  |
| KO V5-empty vs. KO SYN-hAP4B1  | ns         | 0.1704  | ns          | >0.9999 | ns       | >0.9999 | ns        | 0.0992  | ns     | >0.9999 | ns     | >0.9999 |

|                                 |        |         |             |         |           |         |            |         |    |         |    |        |
|---------------------------------|--------|---------|-------------|---------|-----------|---------|------------|---------|----|---------|----|--------|
| KO CBh-hAP4B1 vs. KO SYN-hAP4B1 | ns     | 0.8397  | ns          | 0.9948  | *         | 0.0246  | ns         | 0.8029  | ns | >0.9999 | ns | 0.9996 |
|                                 | CORTEX |         | HIPPOCAMPUS |         | BRAINSTEM |         | CEREBELLUM |         |    |         |    |        |
| FIGURE 6B                       | Symbol | P Value | Symbol      | P Value | Symbol    | P Value | Symbol     | P Value |    |         |    |        |
| WT vs. KO untreated             | ****   | <0.0001 | ****        | <0.0001 | ****      | <0.0001 | ****       | <0.0001 |    |         |    |        |
| WT vs. KO V5_control            | ****   | <0.0001 | ****        | <0.0001 | ****      | <0.0001 | ****       | <0.0001 |    |         |    |        |
| WT vs. KO hAP4B1_low            | ***    | 0.0001  | ****        | <0.0001 | *         | 0.0207  | ***        | 0.0001  |    |         |    |        |
| WT vs. KO hAP4B1_mid            | **     | 0.0083  | *           | 0.0113  | ns        | 0.1093  | ns         | 0.0877  |    |         |    |        |
| WT vs. KO hAP4B1_high           | ns     | 0.2407  | ns          | 0.2884  | ns        | 0.8943  | ns         | 0.4531  |    |         |    |        |
| KO untreated vs. KO V5_control  | ns     | >0.9999 | ns          | 0.8751  | ns        | 0.9474  | ns         | >0.9999 |    |         |    |        |
| KO untreated vs. KO hAP4B1_low  | ns     | 0.9241  | ns          | 0.9998  | ns        | 0.6592  | ns         | 0.1345  |    |         |    |        |
| KO untreated vs. KO hAP4B1_mid  | ns     | 0.2928  | ns          | 0.1274  | ns        | 0.2767  | ***        | 0.0010  |    |         |    |        |

|                                  |           |         |            |         |          |         |        |         |  |  |  |  |
|----------------------------------|-----------|---------|------------|---------|----------|---------|--------|---------|--|--|--|--|
| KO untreated vs. KO hAP4B1_high  | *         | 0.0117  | **         | 0.0029  | **       | 0.0051  | ****   | <0.0001 |  |  |  |  |
| KO V5_control vs. KO hAP4B1_low  | ns        | 0.8525  | ns         | 0.7342  | ns       | 0.1638  | ns     | 0.1030  |  |  |  |  |
| KO V5_control vs. KO hAP4B1_mid  | ns        | 0.2062  | **         | 0.0055  | *        | 0.0349  | ***    | 0.0006  |  |  |  |  |
| KO V5_control vs. KO hAP4B1_high | **        | 0.0064  | ****       | <0.0001 | ***      | 0.0002  | ****   | <0.0001 |  |  |  |  |
| KO hAP4B1_low vs. KO hAP4B1_mid  | ns        | 0.8700  | ns         | 0.2265  | ns       | 0.9889  | ns     | 0.5070  |  |  |  |  |
| KO hAP4B1_low vs. KO hAP4B1_high | ns        | 0.1585  | **         | 0.0074  | ns       | 0.2717  | ns     | 0.0631  |  |  |  |  |
| KO hAP4B1_mid vs. KO hAP4B1_high | ns        | 0.7886  | ns         | 0.7872  | ns       | 0.6527  | ns     | 0.9366  |  |  |  |  |
|                                  | BRAINSTEM |         | CEREBELLUM |         | CEREBRUM |         | LIVER  |         |  |  |  |  |
| FIGURE 6C                        | Symbol    | P Value | Symbol     | P Value | Symbol   | P Value | Symbol | P Value |  |  |  |  |
| WT vs. KO V5-control             | ns        | >0.9999 | ns         | >0.9999 | ns       | >0.9999 | ns     | >0.9999 |  |  |  |  |
| WT vs. KO low-dose               | ns        | 0.9997  | ns         | 0.9777  | ns       | 0.9786  | ns     | 0.5444  |  |  |  |  |

|                                |           |         |           |         |           |         |           |         |  |  |  |  |
|--------------------------------|-----------|---------|-----------|---------|-----------|---------|-----------|---------|--|--|--|--|
| WT vs. KO mid-dose             | ns        | 0.9862  | ns        | 0.8468  | ns        | 0.7408  | ns        | >0.9999 |  |  |  |  |
| WT vs. KO high-dose            | ns        | 0.4411  | **        | 0.0066  | ns        | 0.9490  | ns        | 0.2376  |  |  |  |  |
| KO V5-control vs. KO low-dose  | ns        | 0.9997  | ns        | 0.9783  | ns        | 0.9866  | ns        | 0.5452  |  |  |  |  |
| KO V5-control vs. KO mid-dose  | ns        | 0.9862  | ns        | 0.8488  | ns        | 0.7789  | ns        | >0.9999 |  |  |  |  |
| KO V5-control vs. KO high-dose | ns        | 0.4413  | **        | 0.0067  | ns        | 0.9639  | ns        | 0.2381  |  |  |  |  |
| KO low-dose vs. KO mid-dose    | ns        | 0.9975  | ns        | 0.9922  | ns        | 0.9667  | ns        | 0.5604  |  |  |  |  |
| KO low-dose vs. KO high-dose   | ns        | 0.5550  | *         | 0.0337  | ns        | 0.9999  | ns        | 0.9808  |  |  |  |  |
| KO mid-dose vs. KO high-dose   | ns        | 0.7559  | ns        | 0.0976  | ns        | 0.9880  | ns        | 0.2485  |  |  |  |  |
| <b>FIGURE 6D-G</b>             | <b>6D</b> |         | <b>6E</b> |         | <b>6F</b> |         | <b>6G</b> |         |  |  |  |  |
|                                | Symbol    | P Value | Symbol    | P Value | Symbol    | P Value | Symbol    | P Value |  |  |  |  |
| WT vs. KO untreated            | **        | 0.0013  | ****      | <0.0001 | ****      | <0.0001 | ns        | 0.3070  |  |  |  |  |
| WT vs. KO V5-empty             | ***       | 0.0006  | ****      | <0.0001 | ****      | <0.0001 | ns        | 0.9734  |  |  |  |  |

|                               |    |        |    |         |      |         |    |         |  |  |  |  |
|-------------------------------|----|--------|----|---------|------|---------|----|---------|--|--|--|--|
| WT vs. KO low-dose            | *  | 0.0256 | ns | 0.7014  | **** | <0.0001 | ns | >0.9999 |  |  |  |  |
| WT vs. KO mid-dose            | ns | 0.6493 | ns | 0.8100  | **** | <0.0001 | ns | >0.9999 |  |  |  |  |
| WT vs. KO high-dose           | ns | 0.7361 | ns | >0.9999 | **** | <0.0001 | ns | >0.9999 |  |  |  |  |
| KO untreated vs. KO V5-empty  | ns | 0.9999 | ns | >0.9999 | ns   | 0.7178  | ns | 0.7465  |  |  |  |  |
| KO untreated vs. KO low-dose  | ns | 0.9107 | ns | 0.1425  | ns   | 0.9352  | ns | 0.2934  |  |  |  |  |
| KO untreated vs. KO mid-dose  | ns | 0.0901 | ns | 0.1865  | ns   | 0.1570  | ns | 0.2754  |  |  |  |  |
| KO untreated vs. KO high-dose | ns | 0.0648 | *  | 0.0318  | ns   | 0.9360  | ns | 0.2719  |  |  |  |  |
| KO V5-empty vs. KO low-dose   | ns | 0.8022 | ns | 0.1218  | ns   | 0.2089  | ns | 0.9566  |  |  |  |  |
| KO V5-empty vs. KO mid-dose   | *  | 0.0500 | ns | 0.1538  | ns   | 0.8831  | ns | 0.9616  |  |  |  |  |
| KO V5-empty vs. KO high-dose  | *  | 0.0350 | *  | 0.0300  | ns   | 0.2100  | ns | 0.9601  |  |  |  |  |
| KO low-dose vs. KO mid-dose   | ns | 0.5364 | ns | >0.9999 | *    | 0.0204  | ns | >0.9999 |  |  |  |  |
| KO low-dose vs. KO high-dose  | ns | 0.4474 | ns | >0.9999 | ns   | >0.9999 | ns | >0.9999 |  |  |  |  |

|                              |                       |               |                      |               |                        |        |                       |         |                      |  |                        |  |
|------------------------------|-----------------------|---------------|----------------------|---------------|------------------------|--------|-----------------------|---------|----------------------|--|------------------------|--|
| KO mid-dose vs. KO high-dose | ns                    | >0.9999       | ns                   | >0.9999       | *                      | 0.0205 | ns                    | >0.9999 |                      |  |                        |  |
| FIGURE 7A                    | 7A<br>Symbol          | 7A<br>P Value | 7B<br>Symbol         | 7B<br>P Value |                        |        |                       |         |                      |  |                        |  |
| KO UT vs. KO 1E3 AAV9/AP4B1  | ns                    | 0.9995        | ns                   | 0.9813        |                        |        |                       |         |                      |  |                        |  |
| KO UT vs. KO 1E4 AAV9/AP4B1  | ns                    | 0.6803        | ns                   | 0.9532        |                        |        |                       |         |                      |  |                        |  |
| KO UT vs. KO 1E5 AAV9/AP4B1  | ****                  | <0.0001       | ns                   | 0.7544        |                        |        |                       |         |                      |  |                        |  |
| KO UT vs. KO 1E6 AAV9/AP4B1  | ****                  | <0.0001       | *                    | 0.0237        |                        |        |                       |         |                      |  |                        |  |
| KO UT vs. KO 2E6 AAV9/AP4B1  | ****                  | <0.0001       | ***                  | 0.0002        |                        |        |                       |         |                      |  |                        |  |
| KO UT vs. KO 4E6 AAV9/AP4B1  | ****                  | <0.0001       | ****                 | <0.0001       |                        |        |                       |         |                      |  |                        |  |
| KO UT vs. KO 8E6 AAV9/AP4B1  | ****                  | <0.0001       | ****                 | <0.0001       |                        |        |                       |         |                      |  |                        |  |
| KO UT vs. KO 16E6 AAV9/AP4B1 | ****                  | <0.0001       | ****                 | <0.0001       |                        |        |                       |         |                      |  |                        |  |
| FIGURE 8A                    | WBC count<br>(28 day) |               | Monocyte<br>(28 day) |               | Lymphocyte<br>(28 day) |        | WBC count<br>(1 year) |         | Monocyte<br>(1 year) |  | Lymphocyte<br>(1 year) |  |



|                           | Symbol | P Value | Symbol | P Value | Symbol | P Value | Symbol | P Value | Symbol | P Value | Symbol | P Value |
|---------------------------|--------|---------|--------|---------|--------|---------|--------|---------|--------|---------|--------|---------|
| Untreated vs. V5-empty    | ns     | 0.9339  | ns     | 0.7299  | ns     | 0.9878  | ns     | 0.7179  | ns     | 0.9998  | ns     | 0.9175  |
| Untreated vs. CBh-hAP4B1  | **     | 0.0014  | ns     | 0.0503  | **     | 0.0028  | ns     | 0.7463  | ns     | 0.9985  | ns     | 0.9012  |
| Untreated vs. SYN-hAP4B1  | ns     | 0.996   | ns     | 0.9844  | ns     | 0.9996  | ns     | 0.3764  | ns     | 0.9975  | ns     | 0.5776  |
| Untreated vs. CBh-mAP4B1  | ns     | 0.9632  | ns     | 0.314   | ns     | 0.993   | ns     | 0.8249  | ns     | 0.9995  | ns     | 0.9417  |
| V5-empty vs. CBh-hAP4B1   | *      | 0.0254  | ns     | 0.6823  | *      | 0.0212  | ns     | >0.9999 | ns     | >0.9999 | ns     | >0.9999 |
| V5-empty vs. SYN-hAP4B1   | ns     | 0.9992  | ns     | 0.9896  | ns     | 0.9998  | ns     | 0.9673  | ns     | >0.9999 | ns     | 0.9917  |
| V5-empty vs. CBh-mAP4B1   | ns     | >0.9999 | ns     | 0.9922  | ns     | >0.9999 | ns     | 0.9996  | ns     | >0.9999 | ns     | >0.9999 |
| CBh-hAP4B1 vs. SYN-hAP4B1 | **     | 0.0077  | ns     | 0.2576  | **     | 0.0086  | ns     | 0.9578  | ns     | >0.9999 | ns     | 0.9942  |
| CBh-hAP4B1 vs. CBh-mAP4B1 | *      | 0.0184  | ns     | 0.9686  | *      | 0.0174  | ns     | 0.9999  | ns     | >0.9999 | ns     | >0.9999 |
| SYN-hAP4B1 vs. CBh-mAP4B1 | ns     | 0.9999  | ns     | 0.7856  | ns     | >0.9999 | ns     | 0.9195  | ns     | >0.9999 | ns     | 0.9854  |
| FIGURE EV1                | EV1 B  |         | EV1 C  |         |        |         |        |         |        |         |        |         |

|                  | Symbol | P value | Symbol | P value    |        |         |  |  |  |  |  |  |
|------------------|--------|---------|--------|------------|--------|---------|--|--|--|--|--|--|
| WT vs UT         | ns     | 0.9073  | ***    | 0.0005     |        |         |  |  |  |  |  |  |
| WT vs MOI 5      | ns     | 0.9971  | ns     | 0.0562     |        |         |  |  |  |  |  |  |
| WT vs MOI 10     | ns     | 0.9864  | ns     | 0.9112     |        |         |  |  |  |  |  |  |
| WT vs MOI 20     | ns     | 0.7331  | ns     | 0.9582     |        |         |  |  |  |  |  |  |
| UT vs MOI 5      | ns     | 0.9826  | *      | 0.0443     |        |         |  |  |  |  |  |  |
| UT vs MOI 10     | ns     | 0.6721  | **     | 0.0014     |        |         |  |  |  |  |  |  |
| UT vs MOI 20     | ns     | 0.2957  | **     | 0.0011     |        |         |  |  |  |  |  |  |
| MOI 5 vs MOI 10  | ns     | 0.9186  | ns     | 0.1996     |        |         |  |  |  |  |  |  |
| MOI 5 vs MOI 20  | ns     | 0.5495  | ns     | 0.1560     |        |         |  |  |  |  |  |  |
| MOI 10 vs MOI 20 | ns     | 0.9411  | ns     | 0.9998     |        |         |  |  |  |  |  |  |
| FIGURE EV2       | Symbol | P value |        | FIGURE EV4 | Symbol | P value |  |  |  |  |  |  |

|             |      |         |  |           |      |         |  |  |  |  |  |
|-------------|------|---------|--|-----------|------|---------|--|--|--|--|--|
| WT vs. UT   | **** | <0.0001 |  | WT vs. UT | **** | <0.0001 |  |  |  |  |  |
| WT vs. V5   | **** | <0.0001 |  | WT vs. V5 | **** | <0.0001 |  |  |  |  |  |
| WT vs. CBH  | ns   | 0.7952  |  | WT vs. LD | **** | <0.0001 |  |  |  |  |  |
| WT vs. SYN  | ns   | 0.6298  |  | WT vs. MD | ***  | 0.0007  |  |  |  |  |  |
| UT vs. V5   | ns   | 0.2437  |  | WT vs. HD | *    | 0.0126  |  |  |  |  |  |
| UT vs. CBH  | **** | <0.0001 |  | UT vs. V5 | ns   | 0.7636  |  |  |  |  |  |
| UT vs. SYN  | **** | <0.0001 |  | UT vs. LD | ns   | 0.3213  |  |  |  |  |  |
| V5 vs. CBH  | **** | <0.0001 |  | UT vs. MD | **   | 0.0066  |  |  |  |  |  |
| V5 vs. SYN  | **** | <0.0001 |  | UT vs. HD | ***  | 0.0004  |  |  |  |  |  |
| CBH vs. SYN | ns   | 0.9978  |  | V5 vs. LD | ns   | 0.9735  |  |  |  |  |  |
|             |      |         |  | V5 vs. MD | ns   | 0.1471  |  |  |  |  |  |

|  |  |  |  |           |    |        |  |  |  |  |  |
|--|--|--|--|-----------|----|--------|--|--|--|--|--|
|  |  |  |  | V5 vs. HD | *  | 0.0126 |  |  |  |  |  |
|  |  |  |  | LD vs. MD | ns | 0.4929 |  |  |  |  |  |
|  |  |  |  | LD vs. HD | ns | 0.0740 |  |  |  |  |  |
|  |  |  |  | MD vs. HD | ns | 0.8836 |  |  |  |  |  |
